# Supplementary material for: CBFA2T3-GLIS2 model of pediatric acute megakaryoblastic leukemia identifies FOLR1 as a CAR T cell target
Source: PubMed Central journal article supplement (PMC9663156; doi:10.1172/jci157101), 2022-11-15
Supplement: jci-132-157101-s009.pdf [file jci-132-157101-s009.pdf]

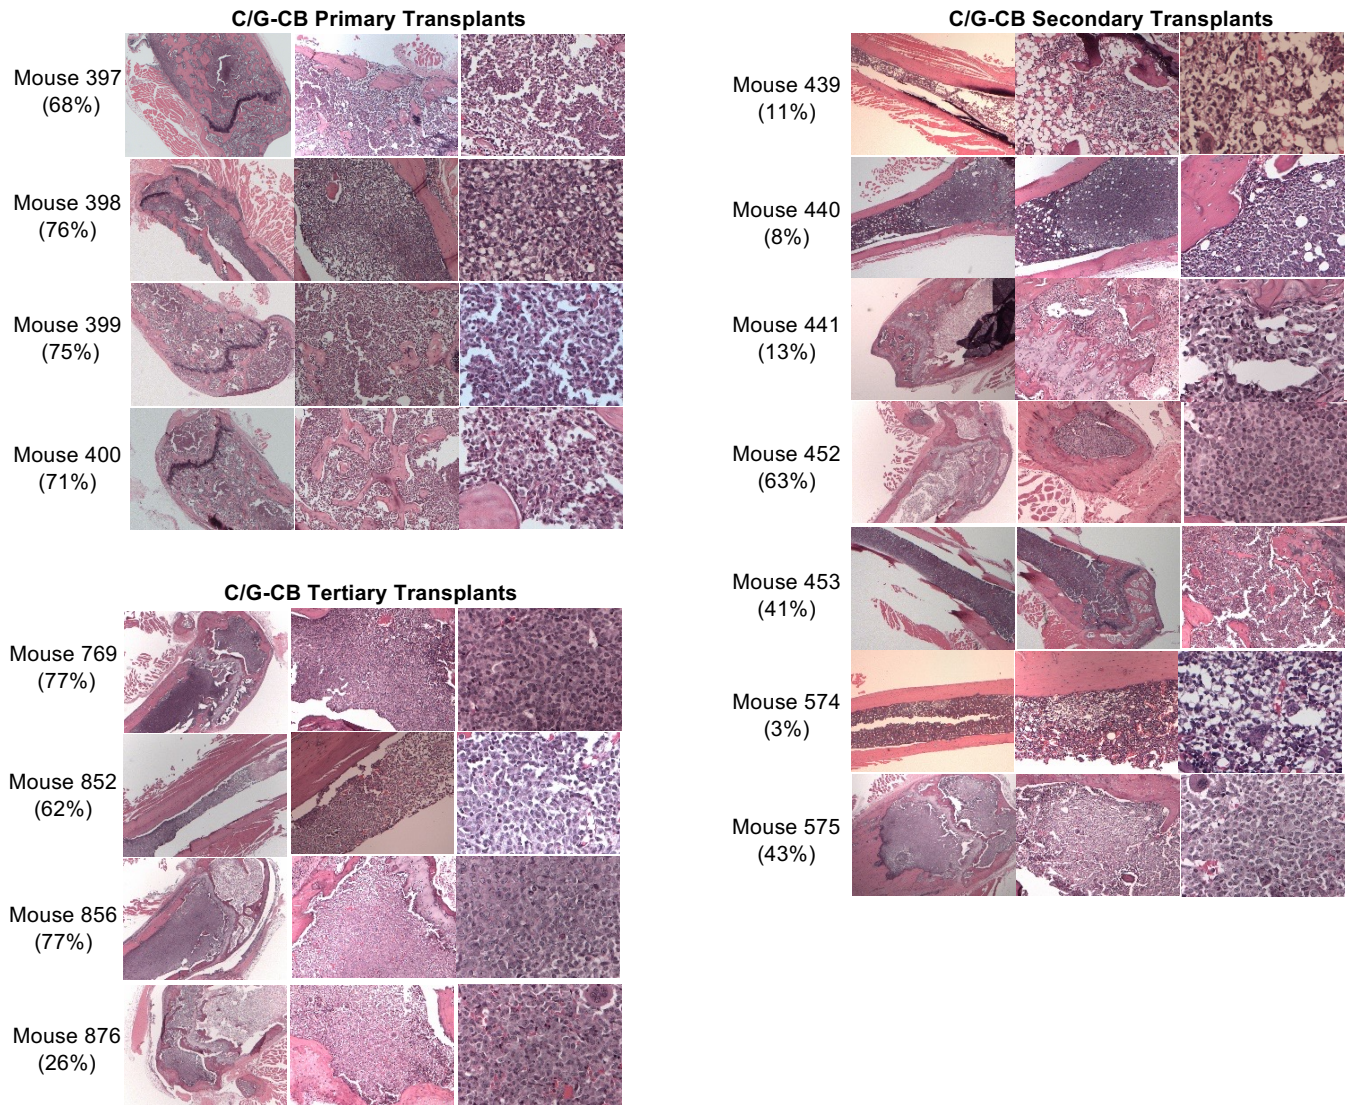

**Supplemental Figure 1. C/G-CB cells form tight clusters in mouse bone marrow. (Related to Figure 1)** H&E stains of femurs taken from primary, secondary and tertiary transplants of C/G-CB cells. Magnification: 2.5X(left), 10X (middle), 40X (right).

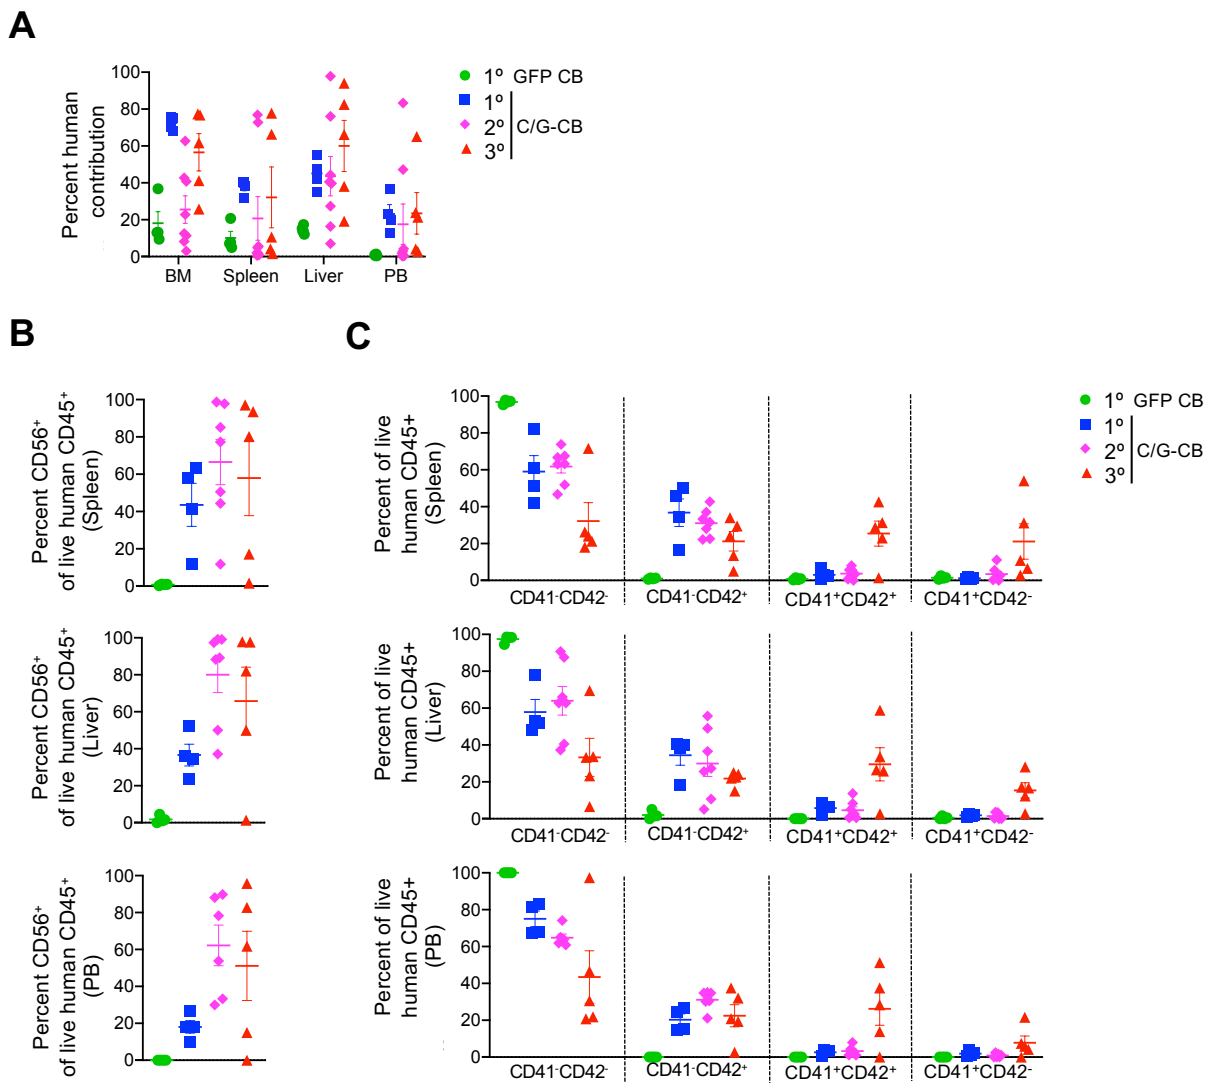

**Supplemental Figure 2. Expression of CD56 and AMKL markers in C/G-CB xenograft cells following development of symptomatic leukemia in NSG-SGM3 mice. (Related to Figure 1) A.** Percent human CD45<sup>+</sup> cells in the bone marrow, spleen, liver and peripheral blood (PB) from mice transplanted with C/G-CB cells in primary (1°, N=4 mice), secondary (2°, N=7 mice) and tertiary (3°, N=5 mice) transplants. **B, C.** Percent CD56<sup>+</sup> and CD41/CD42 subsets in mouse tissues described in A. 1°, N=4 mice per group; 2°, N=7 mice; and 3°, N=5 mice.

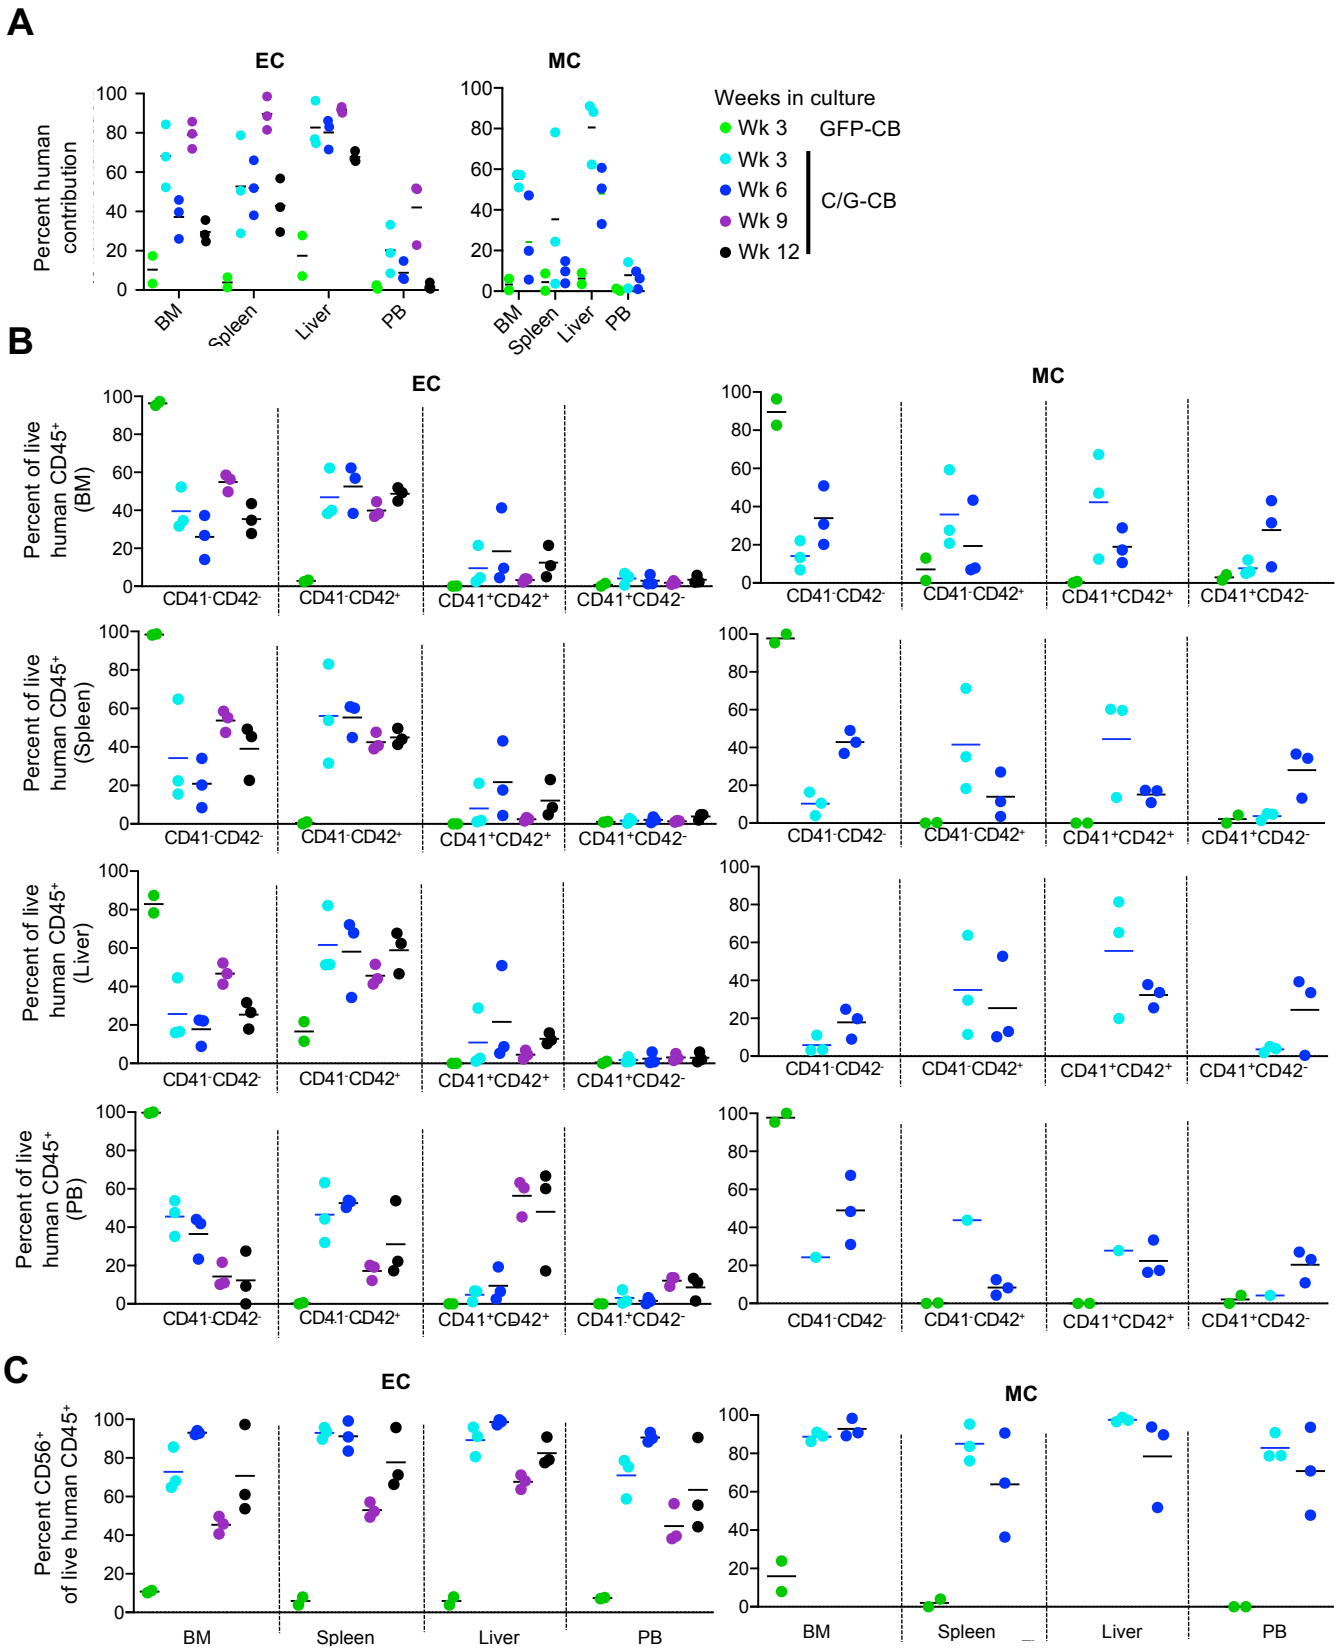

**Supplemental Figure 3. Assessment of RAM and AMKL markers in C/G-CB cells isolated from mice transplanted with engineered cells cultured in EC co-culture or MC. (Related to Figure 2)** **A.** Percent human CD45<sup>+</sup> cells in the bone marrow, spleen liver and peripheral blood from mice transplanted with C/G-CB and GFP-CB cells at indicated timepoints in EC co-culture or MC. **B, C.** Percent CD41/CD42 subsets (B) and CD56<sup>+</sup> cells (C) among live human CD45<sup>+</sup> in mouse tissues described in A. Data analyzing CB cells in the liver for mice transplanted with GFP-CB cells from MC culture are not included as not enough cells were present in these samples. Same goes for peripheral blood data from 2 mice transplanted with C/G-CB cells grown in MC. C/G-CB (N=3 mice/group), GFP-CB (N=2 mice/group)

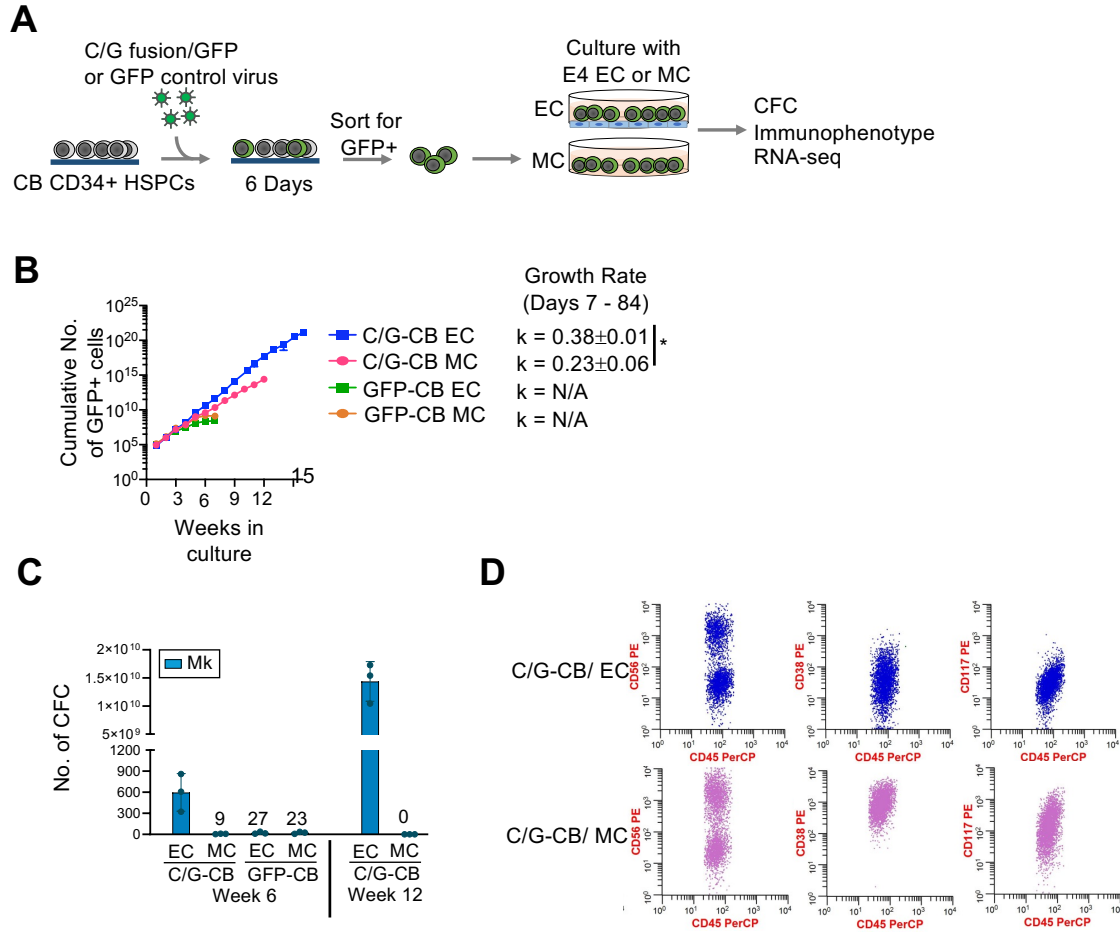

**Supplemental Figure 4. ECs promote transformation of C/G-CB cells. (Related to Figure 2)** **A.** Schematic of transduction and long-term cultures of cord blood CD34+ HSPCs from a second donor. **B.** Growth kinetics of transduced cells over days in EC or MC as determined by the cumulative number of GFP+ cells. Mean +/- standard deviation from 3 technical replicates are shown. Growth rate constant  $k$  was determined by regression analysis using the formula  $N(t) = N(0)e^{kt}$  where  $t$  is measured in days. **C.** Following 6 and 12 weeks of culture, a fraction of each culture was transferred to megacult to enumerate Mk colonies. Data are normalized to the CD34+ input cells at the start of the culture and presented as mean +/- standard deviation from 3 technical replicates. **D.** Expression of the RAM immunophenotype in C/G-CB cells after 6 weeks in either EC co-culture or MC.

**A**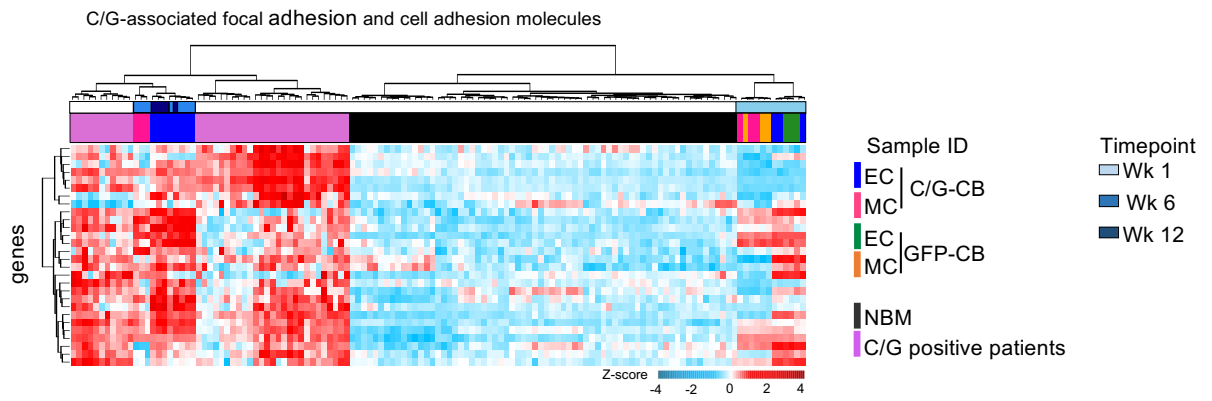**B**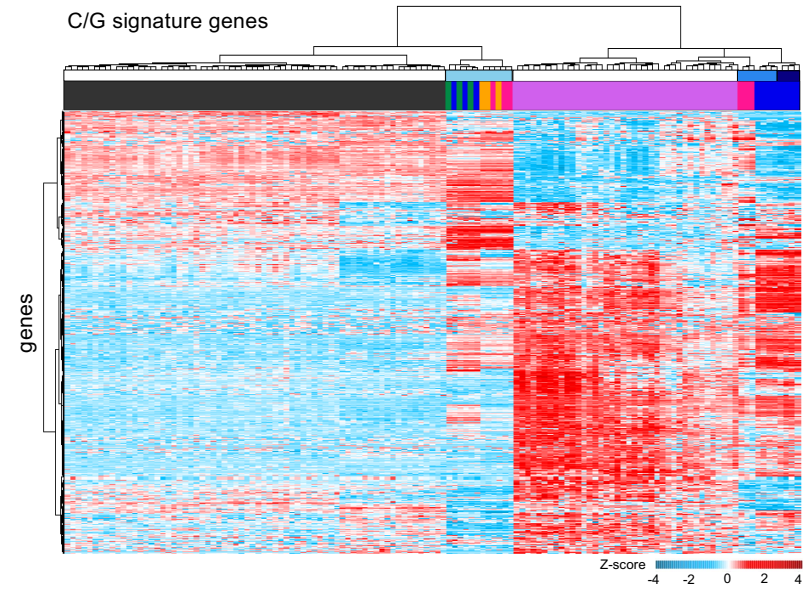**C**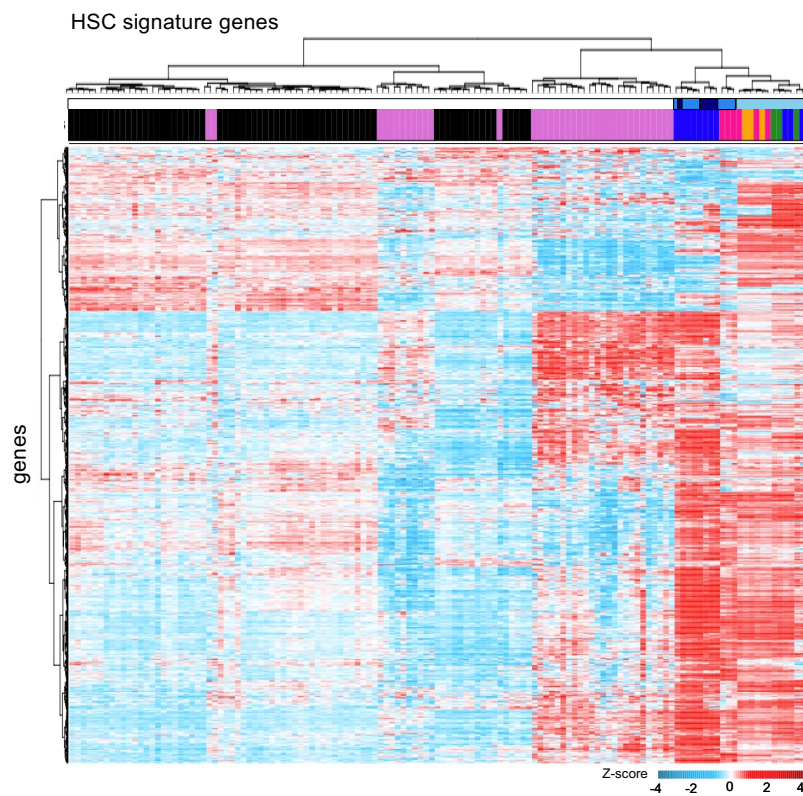

**Supplemental Figure 5. Expression of C/G-specific genes. (Related to Figure 3)** Heat maps showing expression of C/G-specific focal adhesion and cell adhesion molecule genes (**A**), genes associated with primary C/G fusion positive AML (**B**), and HSC signature genes (**C**). Unsupervised hierarchical clustering demonstrates clustering of C/G-CB cells cultured with ECs for 6 and 12 weeks with primary C/G samples. CBFA2T3-GLIS2 primary samples (N=39); NBM samples (N=68). For cultured cells, N=4 technical replicates for C/G-CB cells in EC co-culture at week; N=3 technical replicates for all other groups.

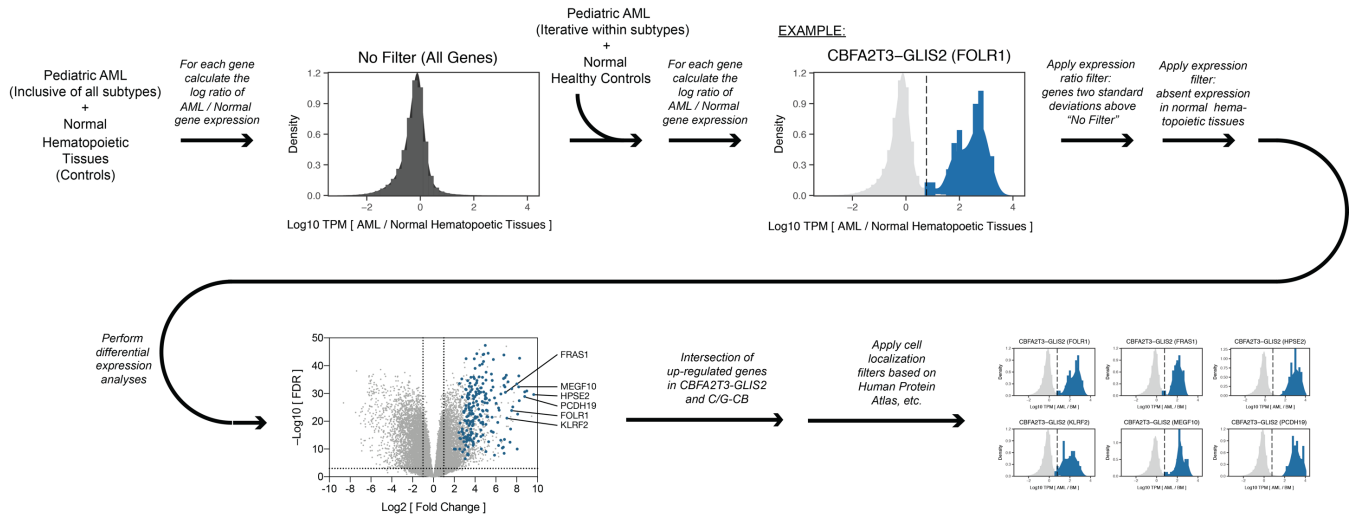

**Supplemental Figure 6. Identification of C/G fusion-specific CAR targets. (Related to Figure 4A)** Flow diagram of AML-restricted gene and CAR-T target identification. The procedure involves three main steps: 1) Determine the ratio of expression for AML primary samples versus healthy normal hematopoietic tissue samples (bulk marrows and CD34+ peripheral blood) from log10 transformed normalized gene expression. The ratio is calculated per gene from mean AML expression and mean normal hematopoietic tissue expression, where normal tissue values are the divisor, which acts as a measure of over or under expression. A normal curve is fit to the ratios and this procedure is completed for all heterogenous AML samples as a group, and iteratively within fusion and mutation subtypes; genes with ratios greater than +2 standard deviations and with absent expression in normal hematopoietic tissues were retained (N=607) for further analysis. 2) The AML restricted genes were further selected if found to be significantly overexpressed in fusion positive patient samples compared to healthy marrows and were likewise overexpressed in C/G-CB at weeks 6 and 12 in EC co-culture with absent expression in GFP-CB controls, providing several candidate (N=42) targets. 3) Optimal CAR-T targets were selected by the identification of candidate genes with cell surface localization potential, and those with an absence of expression in healthy tissue controls as noted in step 1, but expression in > 75% of C/G patient samples, and with moderate to high expression levels (N=6).

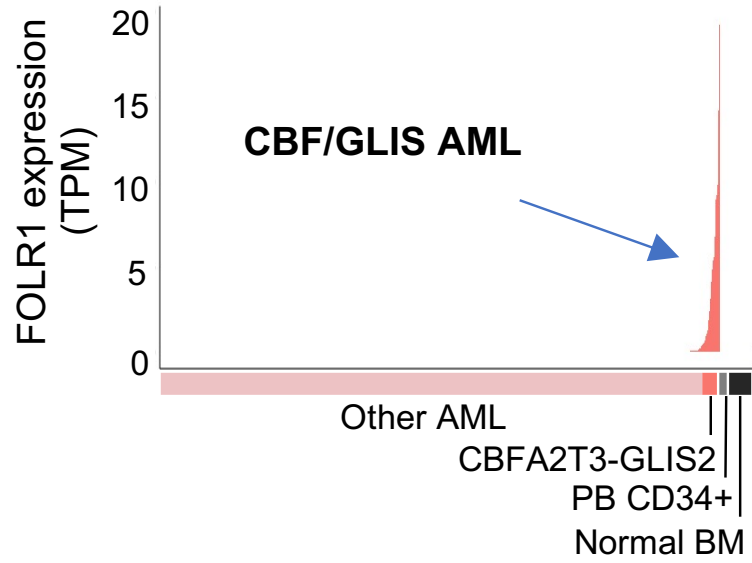

**Supplemental Figure 7. *FOLR1* transcript is uniquely expressed in C/G AML.** Waterplot showing transcript expression (TPM) among C/G AML (red, N=39), other AML (pink, N=1,453), peripheral blood (PB) CD34+ samples (grey, N=16) and bulk bone marrow samples (black, N=68).



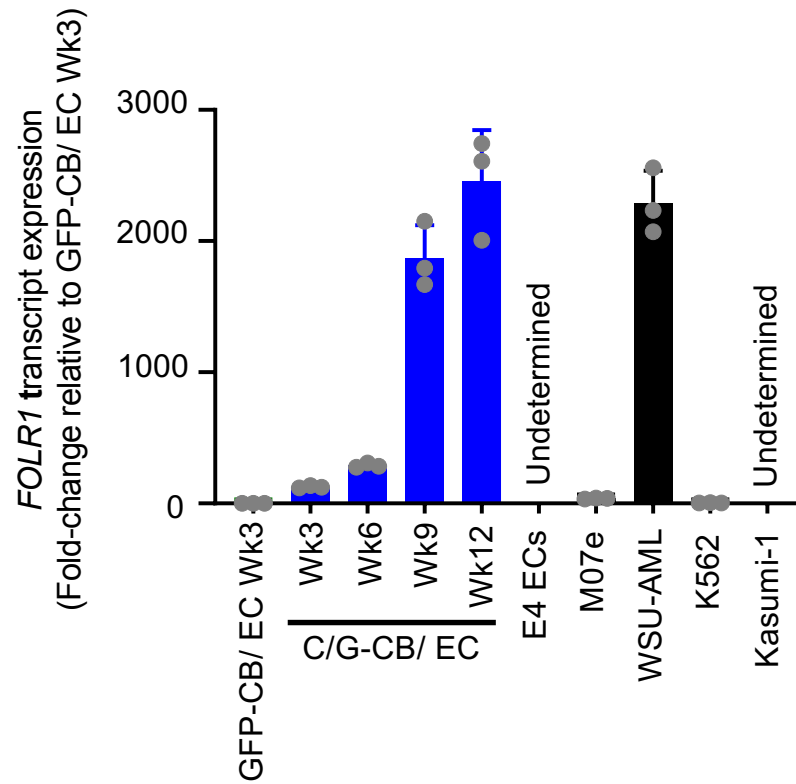

**Supplemental Figure 8. Expression of *FOLR1* transcript in C/G-CB cells cultured on ECs.** RT-PCR analysis of *FOLR1* expression in engineered CB cells and in fusion positive cell lines M07e and WSU-AML. Expression is normalized as fold-change relative to GFP-CB/EC Wk 3 samples. Data shown is the average of 3 technical replicates. Error bars denote standard deviation.

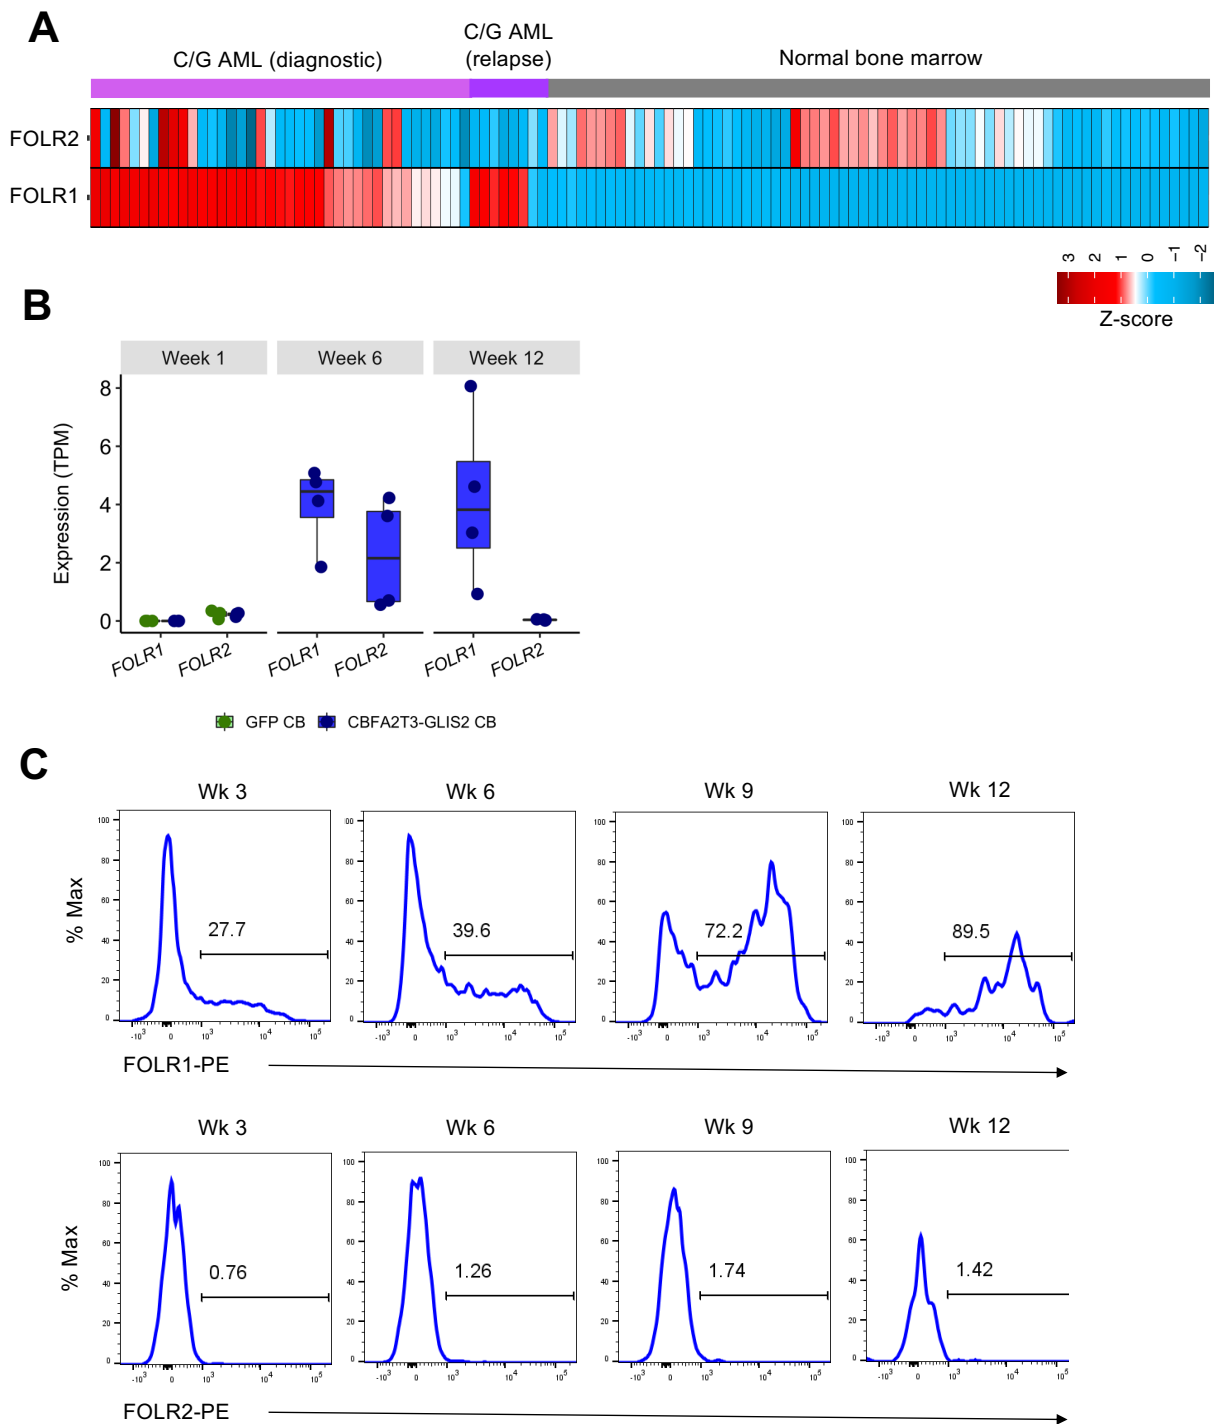

**Supplemental Figure 9. Expression of FOLR2 (folate receptor beta) in C/G AML. A.** Heat map showing expression of FOLR1 and FOLR2 among C/G-positive patients at diagnostic and relapse, and in bone marrow samples from healthy donors. **B, C.** Transcript (B) and cell surface (C) expression of FOLR1 and FOLR2 in C/G-CB and GFP-CB cells over weeks in EC co-culture.

|   | 1               | 2               | 3               | 4               | 5               | 6               | 7           | 8           | 9           | 10                    |
|---|-----------------|-----------------|-----------------|-----------------|-----------------|-----------------|-------------|-------------|-------------|-----------------------|
| A | Cerebrum        | Cerebrum        | Cerebrum        | Cerebrum        | Cerebrum        | Cerebrum        | Cerebellum  | Cerebellum  | Cerebellum  |                       |
| B | Adrenal gland   | Adrenal gland   | Adrenal gland   | Ovary           | Ovary           | Ovary           | Pancreas    | Pancreas    | Pancreas    |                       |
| C | Lymph node      | Lymph node      | Lymph node      | Hypophysis      | Hypophysis      | Hypophysis      | Testis      | Testis      | Testis      |                       |
| D | Thyroid gland   | Thyroid gland   | Thyroid gland   | Breast          | Breast          | Breast          | Spleen      | Spleen      | Spleen      |                       |
| E | Tonsil          | Tonsil          | Tonsil          | Thymus gland    | Thymus gland    | Thymus gland    | Bone marrow | Bone marrow | Bone marrow |                       |
| F | Lung            | Lung            | Lung            | Heart           | Heart           | Heart           | Esophagus   | Esophagus   | Esophagus   |                       |
| G | Stomach         | Stomach         | Stomach         | Small intestine | Small intestine | Small intestine | Colon       | Colon       | Colon       |                       |
| H | Liver           | Liver           | Liver           | Salivary gland  | Salivary gland  | Salivary gland  | Kidney      | Kidney      | Kidney      |                       |
| I | Prostate        | Prostate        | Prostate        | Uterus          | Uterus          | Uterus          | Cervix      | Cervix      | Cervix      |                       |
| J | Striated muscle | Striated muscle | Striated muscle | Skin            | Skin            | Skin            | Nerve       | Nerve       | Nerve       |                       |
| K | Diaphragm       | Diaphragm       | Pericardium     | Eye             | Eye             | Eye             | Larynx      | Larynx      | Larynx      | Adrenal gland (malig) |

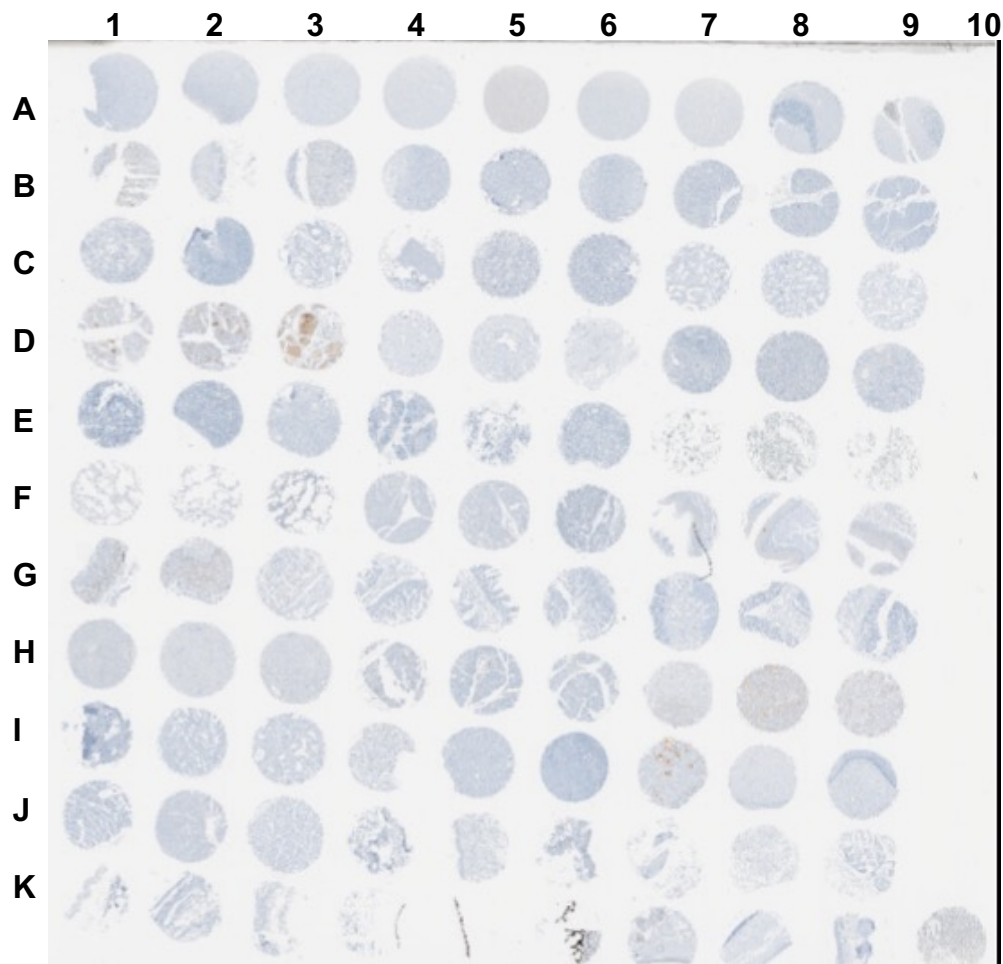

**Supplemental Figure 10. Expression of FOLR1 in normal tissues.** Immunohistochemistry of FOLR1 staining in 32 types of normal human organs (Tissue Microarray, TMA FDA999u), each type taken from 3 different individuals. Top, sample ID; bottom, FOLR1-stained TMA.

**A**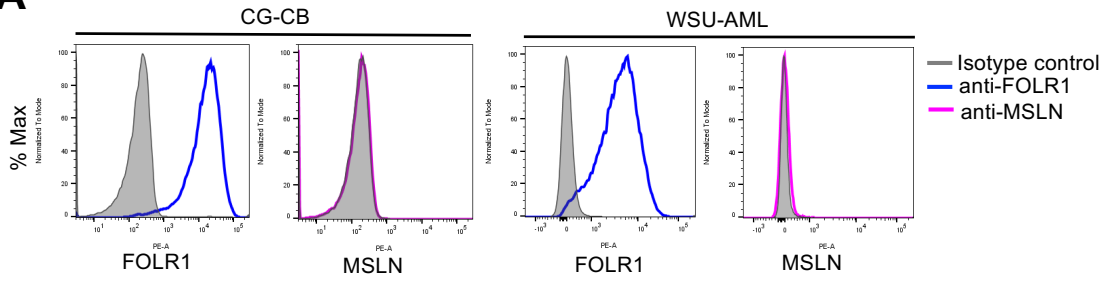**B**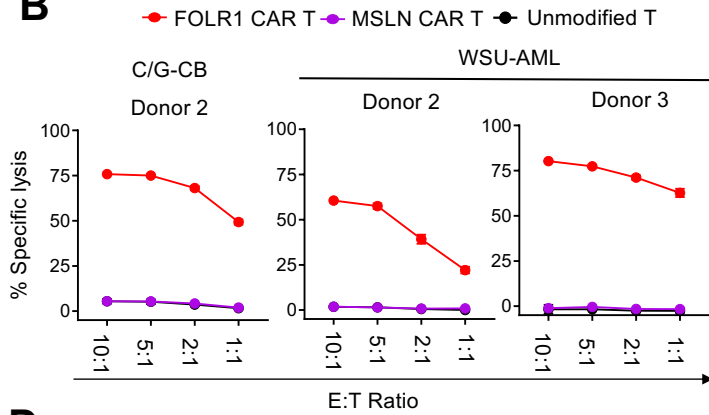**C**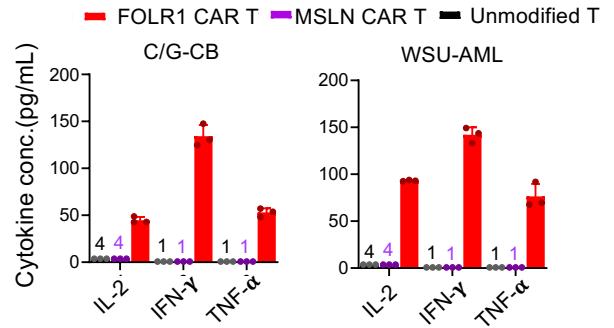**D**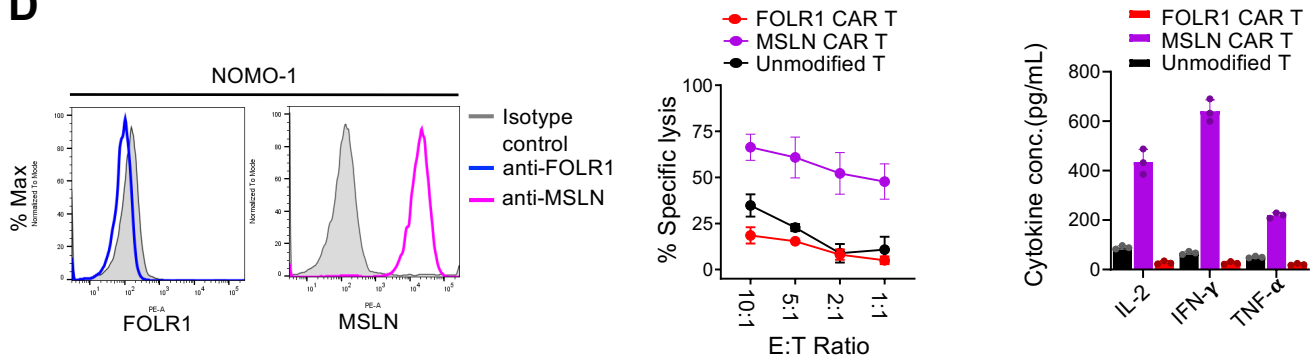**E**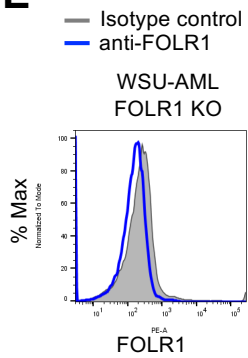**F**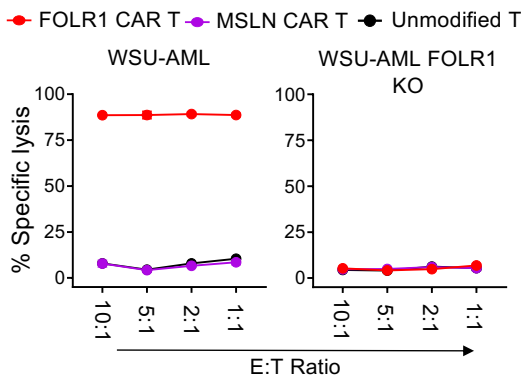**G**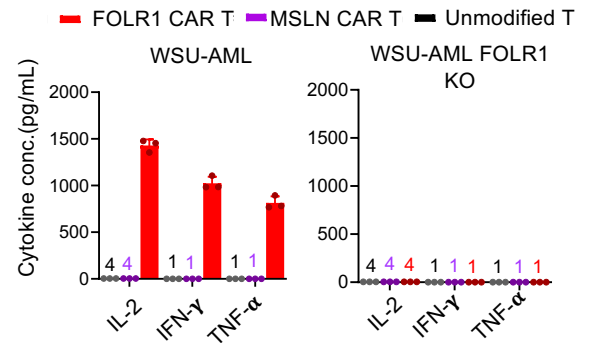

**Supplemental Figure 11. In vitro reactivity of FOLR1 CAR T cells against C/G AML cells.** **A.** Flow cytometric analysis of FOLR1 and MSLN expression in C/G-CB cells and WSU-AML cell line. **B.** Cytolytic activity of CD8 T cells unmodified or transduced with FOLR1 CAR or MSLN CAR following 6 hours of co-culture with C/G-CB (cell taken from >9 weeks in EC co-culture) or WSU-AML. Data presented are mean leukemia specific lysis +/- SD from 3 technical replicates at indicated effector: target (E:T) ratios. T cells were derived from two additional donors. **C.** Concentration of secreted IL-2, IFN- $\gamma$ , and TNF- $\alpha$  in the supernatant following 24 hour of T cell/AML co-culture at 1:1 E:T ratio as measured by ELISA. Data are derived from T cells isolated from donor 2 and are presented as mean +/- SD from 3 technical replicates. Where concentrations of cytokines are too low to discern, the number above the x-axis indicates the average concentration. **D.** Left, flow cytometric analysis of FOLR1 and MSLN expression in Nomo-1 AML cell line. Middle, cytolytic activity of CD8 T cells unmodified or transduced with FOLR1 CAR or MSLN CAR following 24 hours of co-culture with Nomo-1 cells. Data presented are mean leukemia specific lysis +/- SD from 3 technical replicates at indicated E:T ratios. Right, concentration of secreted IL-2, IFN- $\gamma$ , and TNF- $\alpha$  in the supernatant following 24 hour of T cell/AML co-culture at 1:1 E:T ratio as measured by ELISA. Data are derived from T cells isolated from donor 2. **E.** Flow cytometric analysis of FOLR1 in WSU-AML FOLR1 knock out (KO). **F.** Cytolytic activity of CD8 T cells unmodified or transduced with FOLR1 CAR or MSLN CAR following 24 hours of co-culture with WSU-AML cells or WSU-AML FOLR1 KO cells. Data are derived from T cells isolated from donor 2 and are presented as mean +/- SD from 3 technical replicates. **G.** Concentration of secreted IL-2, IFN- $\gamma$ , and TNF- $\alpha$  in the supernatant following 24 hour of T cell/AML co-culture at 1:1 E:T ratio as measured by ELISA. Data are derived from T cells isolated from donor 2 and are presented as mean +/- SD from 3 technical replicates. Where concentrations of cytokines are too low to discern, the number above the x-axis indicates the average concentration.

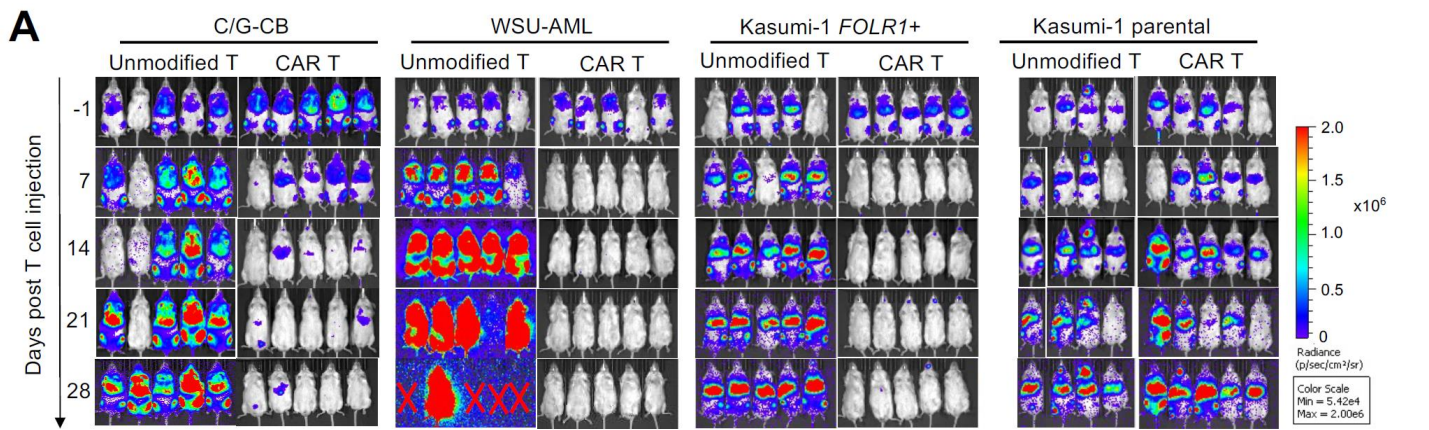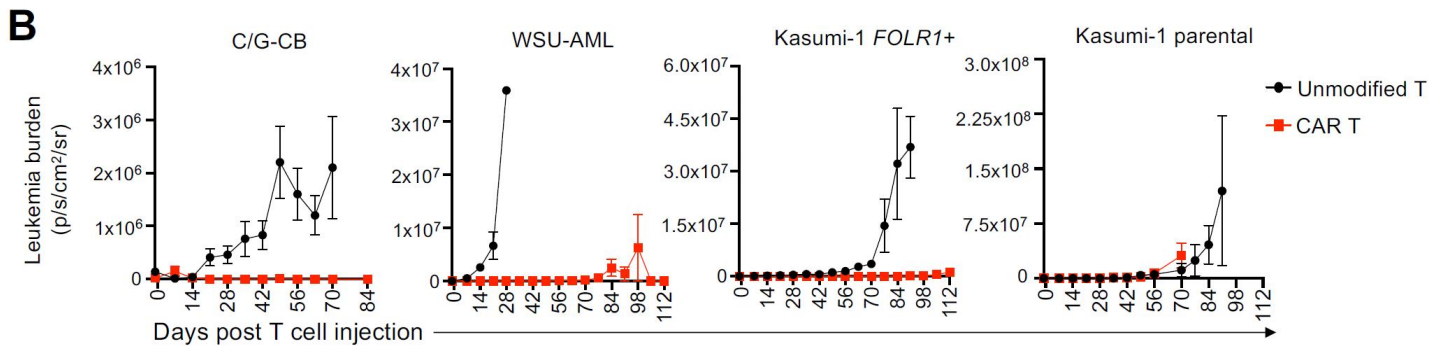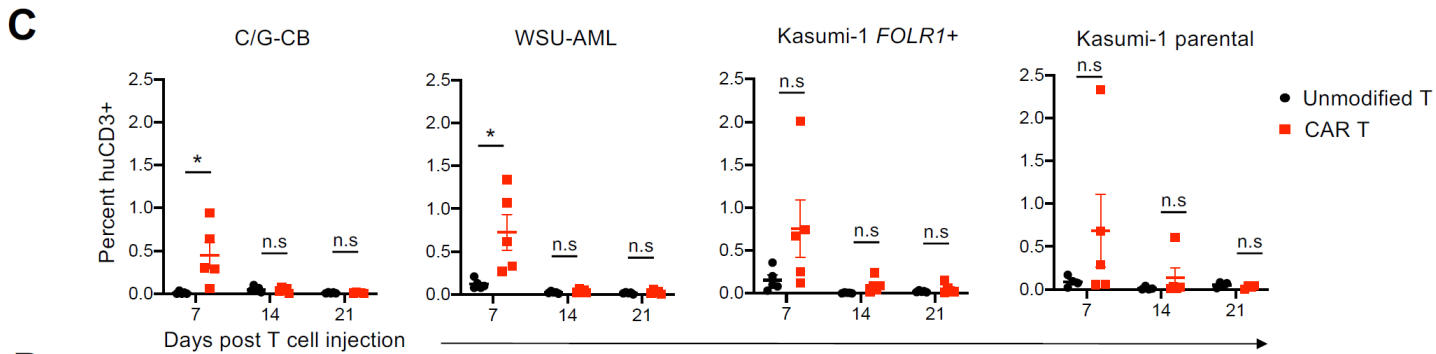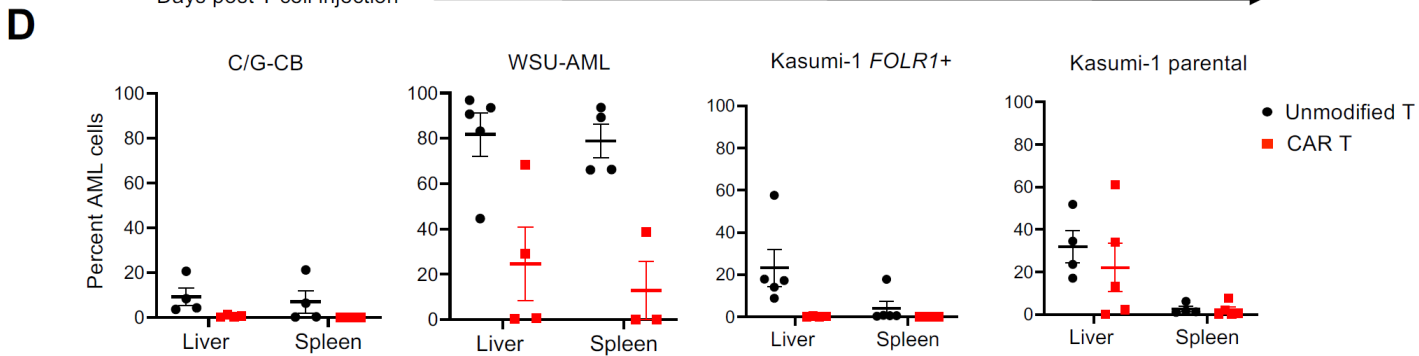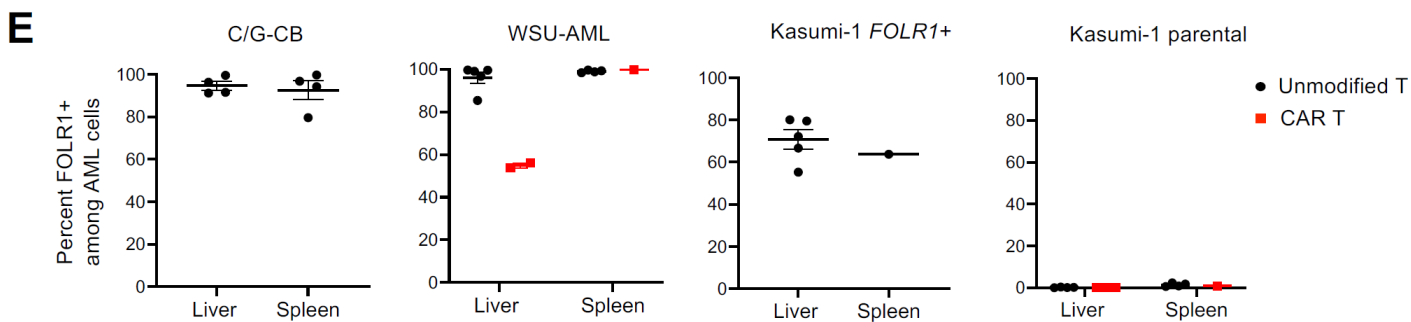

**Supplemental Figure 12. In vivo efficacy of FOLR1-directed CAR T. (Related to Figure 6)**

**A.** Bioluminescent imaging of C/G-CB, WSU-AML, Kasumi-1 *FOLR1*<sup>+</sup> and Kasumi-1 leukemias in mice treated with unmodified or FOLR1 CAR T cells at  $5 \times 10^6$  T cells per mouse. Shown are the images one day before T cell treatment and 4 weeks after T cell treatment. N=5 mice/ group. Radiance scale indicates an increase in leukemia from blue to red; X indicates death.

**B.** Quantification of leukemia burden over time based on IVIS radiance in CBFA2T3-GLIS2-transduced HSPCs, WSU-AML, Kasumi-1 *FOLR1*<sup>+</sup> and Kasumi-1 xenografts treated with unmodified or FOLR1 CAR T cells at  $5 \times 10^6$ /mouse. Leukemia burden is shown for each mouse. N = 5 mice per group. Data presented are the average +/- standard deviation from 5 mice. \*,  $p < 0.05$  (unpaired Student's t-test).

**C.** Quantification of human T cells in the mouse peripheral blood at indicated time points after T cell injection. Shown is human CD45<sup>+</sup>CD3<sup>+</sup> frequency amongst DAPI<sup>-</sup> cells. N = 5 mice per group. Data presented are the average +/- standard deviation from 5 mice. \*,  $p < 0.05$  (unpaired Student's t-test).

**D, E.** Quantification of percent leukemia cells (human CD45<sup>+</sup>, D) and percent FOLR1 positive amongst leukemia cells (E) in the liver and spleen tissues at necropsy (either when mice developed symptomatic leukemia or euthanized at the indicated study endpoint. Note that some mice are missing because they were found dead in cage (FDIC), or tissues were not viable. For cases where leukemia burden is absent, FOLR1 expression could not be determined for these mice and were excluded from the analysis. Data presented are the average +/- standard deviation \*,  $p < 0.05$  (unpaired Student's t-test).

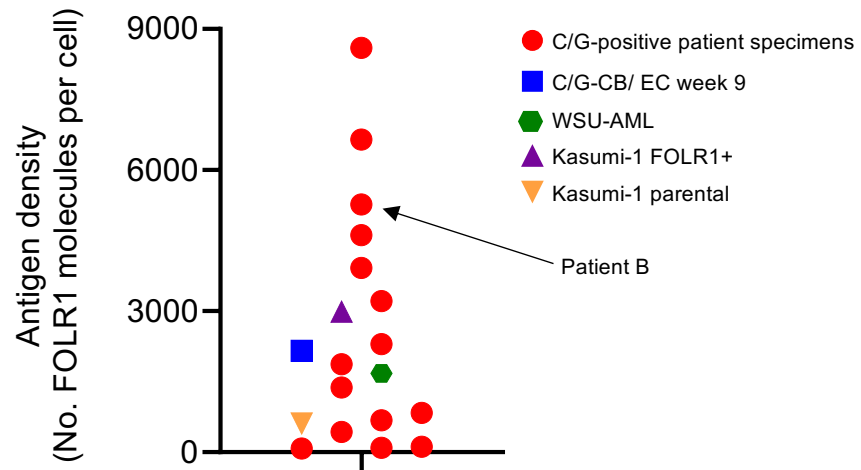

**Supplemental Figure 13. FOLR1 cell surface expression across patient samples, C/G-CB cells, cell lines and engineered cells.** Flow analysis of antigen density (number of FOLR1 molecules per cell) across C/G-positive patient specimens, C/G-CB cells after 9 weeks in EC co-culture, WSU-AML, Kasumi-1 FOLR1+ and Kasumi-1 parental cells. Arrow points to C/G-positive patient (Patient B) used in the evaluation of FOLR1 CAR T cells (Figure 7).



● FOLR1 CAR T ● MSLN CAR T ● Unmodified T

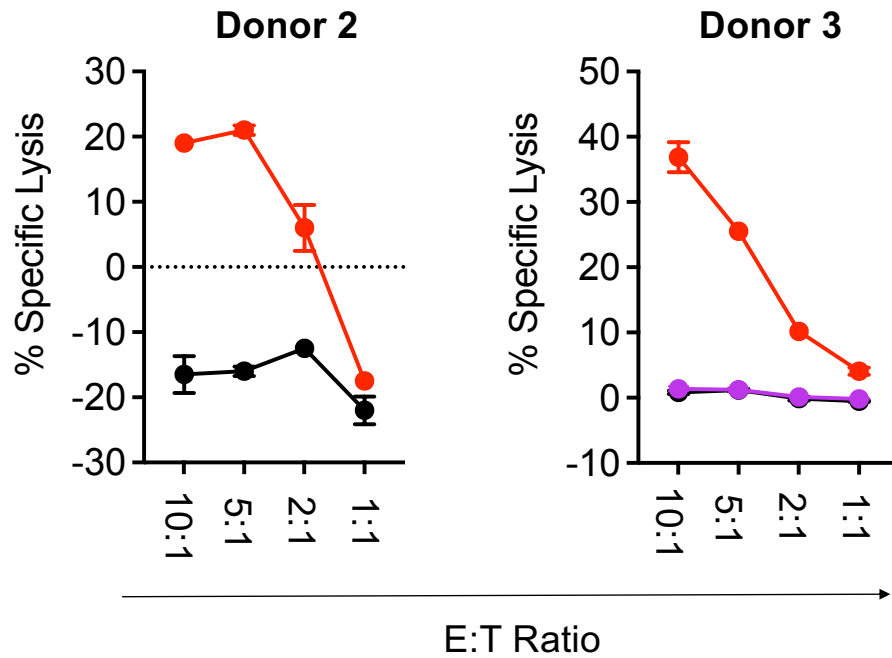

**Supplemental Figure 14. In vitro cytotoxicity of FOLR1 CAR T cells against primary C/G AML cells (Related to Figure 7)** Cytolytic activity of CD8 T cells unmodified or transduced with FOLR1 CAR or MSLN CAR following 6 hours of co-culture with primary C/G AML cells. CAR T cells were produced from two additional donors (separate from the donor shown in Figure 7).

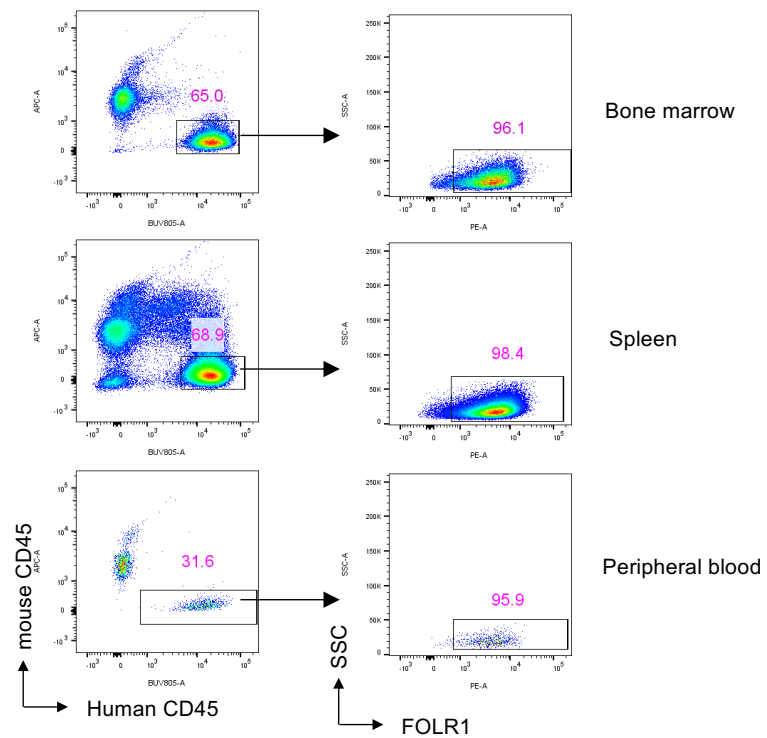

**Supplemental Figure 15. Expression of FOLR1 in primary AML cells that were present in CAR T-treated mouse that developed symptomatic leukemia at 180 days post T cell injection. (Related to Figure 7)** Left, percent of human CD45+ cells in the bone marrow, spleen and blood of the CAR T-treated mouse that relapsed at day 180 post T cell injection. Right, percent of human CD45+ cells that expression FOLR1.

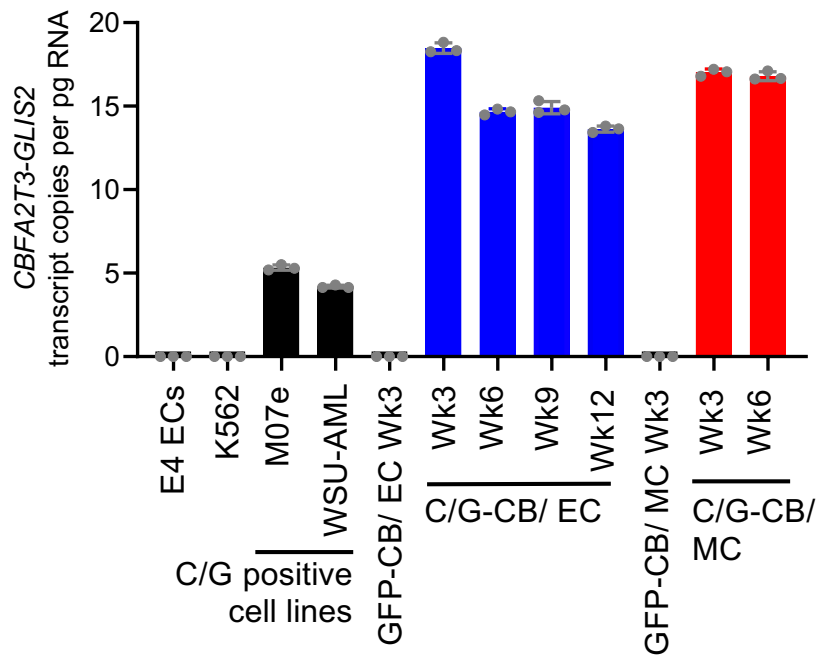

**Supplemental Figure 16. Expression of C/G transcript in C/G-CB cells.** RT-PCR analysis of C/G expression in engineered CB cells and in fusion positive cell lines M07e and WSU-AML. Data shown is the average of 3 technical replicates. Error bars denote standard deviation.

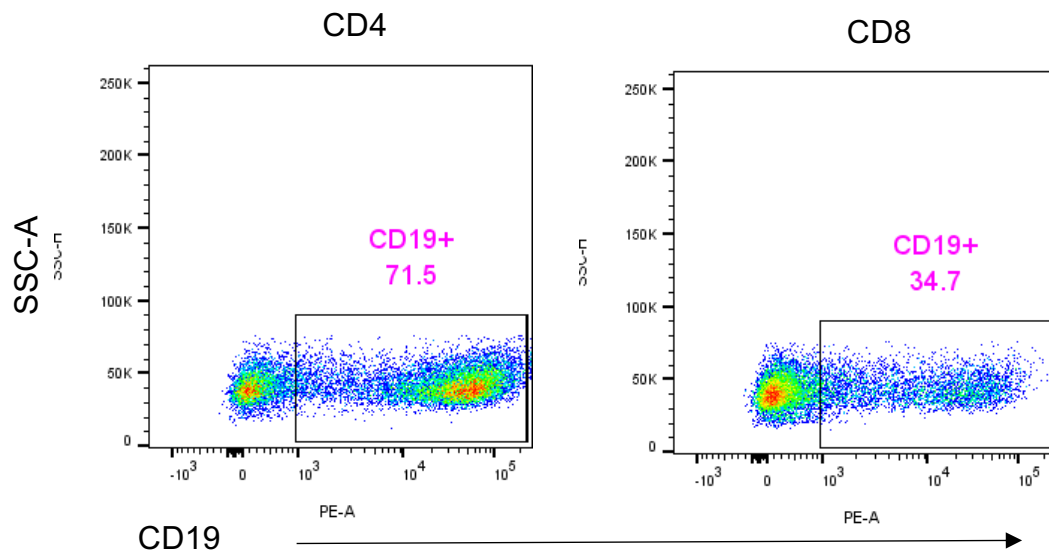

**Supplemental Figure 17. Transduction efficiency of FOLR1 CAR construct.** Representative transduction efficiency of CD4 and CD8 T cells with FOLR1 CAR (intermediate spacer) lentivirus after 7 days post transduction.

1 **Supplemental Information**

2

3 **Constructs and Lentivirus production**

4

5 The MSCV-CBFA2T3-GLIS2-IRES-mCherry construct was a gift from Dr. Tanja Gruber  
6 (Department of Oncology, St. Jude Children’s Research Hospital, Memphis, Tn, Ref(1)). The  
7 C/G fusion gene from this construct and the MND promoter were inserted into pRRLhPGK-GFP  
8 lentivirus vector(2) as described in Ref.(3).

9 CAR constructs containing IgG4 short, intermediate and long spacers are previously  
10 described in Ref.(4). The VL and VH sequences from Farletuzumab were used to construct the  
11 anti-FOLR1 scFv with VL/VH orientation using G4SX4 linker. Anti-FOLR1 scFv DNA fragment  
12 was human codon optimized and synthesized by IDT gBlock gene fragment and cloned into the  
13 CAR vectors with NheI and RsrII restriction sites upstream of the IgG4 spacer. MSLN CAR  
14 construct with short spacer used in this study as an irrelevant CAR control was previously  
15 described Ref. (37).

16 Lentivirus particles were produced in 293T cells (ATCC, Cat#CRL-3216). 293T cells  
17 were transfected with transfer vector, viral packaging vector (psPAX2), and viral envelope  
18 vector (pMD2G) at 4:2:1 ratio using Mirus 293Trans-IT transfection agent (Mirus, Cat#  
19 MIR2700) as directed by manufacturer’s protocol. Viral particles were collected each day for 4  
20 days post transfection, filtered through 0.45 µm membrane (Thermo Fisher; Cat NAL-166-0045)  
21 and concentrated (overnight spin at 4°C, 5000rpm) before use.

22

23 **Farletuzumab scFv**

24

25 DIQLTQSPSSLSASVGDRTITCSVSSSISNNLHWYQQKPGKAPKRWIYGTSNLSGVPSRFS  
26 GSGSGTDYFTFTISLQPEDATYYCQQWSSYPYMYTFGQGTKVEIKGGGGSGGGGSGGGGS

27 GGGGSEVQLVESGGGVVQPGRSLRLSCSASGFTFSGYGLSWVRQAPGKGLEWVAMISSGGG  
28 YTTYADSVKGRFAISRDNKNTLFLQMDSLRLPEDTGVYFCARHGDDPAWFAYWGQGTPVTVS  
29 S

30

### 31 **RNA-seq analysis**

32

33 Screening of C/G Fusion in patient samples. The C/G fusion transcript was detected by  
34 Fragment length analysis or fusion detection algorithms STAR-fusion v1.1.0 and TransAbyss  
35 v1.4.10(5, 6). Details of the procedure are described previously(3).

36

37 Transcriptome Analysis: Differentially expressed genes between C/G-CB and GFP-CB cells  
38 were identified using the limma voom (v3.44.3 R package) with trimmed mean of M values  
39 (TMM) normalized gene counts(7). Genes with absolute log<sub>2</sub> fold-change > 1 and Benjamini-  
40 Hochberg adjusted p-values < 0.05 were retained. Unsupervised hierarchical clustering was  
41 completed using the ComplexHeatmap R package (v2.4.3), utilizing Euclidean distances with  
42 the ward.D2 linkage algorithm. Log<sub>2</sub> transformed TMM normalized counts per million (CPM)  
43 were used as input, with a count of 1 added to avoid taking the log of zero. Hierarchical  
44 clustering of primary C/G AML samples and C/G-CB cells using a C/G transcriptome signature  
45 was carried out. The signature genes (N=1,116 genes) were defined as those within the 75<sup>th</sup>  
46 percentile of absolute log<sub>2</sub> fold-changes and adj. p.value < 0.001, when contrasting C/G fusion  
47 positive patients (N=39) against a heterogenous AML reference cohort (N=1,355). The 85<sup>th</sup>  
48 percentile of this signature (N = 167 genes) was used to define a C/G gene set in GSEA.

49 Gene-set enrichment scores were calculated using the single-sample gene-set  
50 enrichment (ssGSEA) method (GSVA v1.32.0), which transforms normalized count data from a  
51 gene by sample matrix to a gene-set by sample matrix(8). Counts were TMM normalized and  
52 log<sub>2</sub>(x+1) transformed prior to gene-set analysis. Curated signaling and metabolic gene-sets

53 from the KEGG database were included in the analysis (gageData v2.26.0). Significant gene-  
54 sets (Benjamini–Hochberg adjusted p-values < 0.05) associated with C/G-CB cells were  
55 identified using limma v3.44.3 with the GSVA transformed gene-set by sample matrix as input.

56 GSEA was performed using the ‘unpaired’ comparison in the GAGE R package  
57 (v2.38.3), which tests for differential expression of gene-sets by contrasting C/G-CB against  
58 GFP-CB cells in each condition to define pathways enriched in EC co-culture versus MC. Non-  
59 redundant gene-sets were extracted for further analysis, followed by the identification of core  
60 genes that contribute to the pathway enrichment. Gene-sets from the Molecular Signatures  
61 Database (MSigDB) and the KEGG pathway database were used. Enrichment score plots for  
62 the HSC and C/G signatures were generated using the R package fgsea (v1.14.0). Log fold  
63 change values obtained from limma (contrasting C/G-CB EC week 6 against C/G-CB MC week  
64 6) were used as a ranking metric for genes in the two signatures.

65 Unsupervised clustering of C/G-CB cells with pediatric AML primary diagnostic samples  
66 (N=1,033) and healthy normal bone marrows (N=68) was performed by uniform manifold  
67 approximation and projection (UMAP) using the uwot v0.1.8 R package(9). For UMAP  
68 clustering, gene counts underwent variance stabilizing transformation (VST) using the DESeq2  
69 v1.28.1 package. Input genes for clustering (N=6,678 genes) were selected using the mean  
70 versus dispersion parametric model trend (SeqGlue v0.1) to identify genes with high variability.

71 Identification of fusion-specific CAR targets involves three main steps: 1) Determine the  
72 ratio of expression for AML primary samples versus healthy normal hematopoietic tissue  
73 samples (bulk normal bone marrow, N=68, in combination with CD34+ selected peripheral blood  
74 samples, N=16) from log10 transformed normalized expression as transcripts per million,  
75 (TPM). Normalization was completed on the full gene expression matrix followed by ratio  
76 analysis on 19,901 annotated protein-coding genes for the identification of therapeutic targets.  
77 The ratio is calculated per gene from the mean expression in AML and normal tissues, where  
78 normal healthy hematopoietic tissue mean expression is the divisor, which acts as a measure of

79 over or under expression. A normal curve is fit to the ratio values, and genes with ratios greater  
80 than +2 standard deviations were retained. This process is carried out for all heterogenous  
81 AML samples (N=1483) as a group and then repeated iteratively within AML fusion and  
82 mutation subtypes, including C/G, to ensure the inherent variability of gene expression in  
83 different fusion classes is addressed and all viable targets are identified for any given subtype.  
84 Genes are then further refined to include those with maximum expression < 1.0 TPM in normal  
85 healthy hematopoietic tissue samples, and thus considered to have AML restricted expression  
86 when compared to healthy controls. 2) AML restricted genes were further selected if found to  
87 be significantly overexpressed by RNA-seq for bulk fusion positive patient samples compared to  
88 bulk healthy bone marrows and were likewise overexpressed in C/G-CB at weeks 6 and 12 in  
89 EC co-culture with an absence of expression (< 1.0 TPM) in GFP-CB controls providing several  
90 candidate targets. 3). Final selection of optimal CAR-T targets was determined by the  
91 identification of candidate genes with cell surface localization potential as annotated by the  
92 Human Protein Atlas (<https://www.proteinatlas.org/>) or Jensen Lab compartments database  
93 (<https://compartments.jensenlab.org/>), in addition to having moderate to high expression in C/G  
94 patient samples (maximum expression  $\geq 10$  TPM), expression in a majority (> 75%) of patient  
95 samples, and an absence of expression in healthy hematopoietic tissues as noted in step 1  
96 above.

97

### 98 **Cell surface analysis**

99 For xenograft CB cells, mouse bone marrow, peripheral blood, spleen, and liver were  
100 harvested at necropsy and processed with red blood cell lysis buffer. Spleen and liver were  
101 processed into cell suspension with glass slides and passed through a 70-um cell strainer. CB  
102 cells in EC co-culture and MC were harvested after vigorously pipetting to resuspend CB cells.  
103 CB cells from processed mouse tissues and cultures were washed in 2% FBS in PBS, blocked  
104 with 2% human AB serum in PBS, then stained with a cocktail of fluorescently labeled



105 monoclonal antibodies for 20 min on ice (see Supplemental Information for antibodies used).  
106 Labeled cells were washed with PBS and resuspended in 2% FBS/PBS prior to flow cytometric  
107 analysis. FACSymphony equipped with FACSDiva Software (BD Biosciences) was used to  
108 assess cell surface expressions and FlowJo Software was used for the analysis. Dead cells  
109 were excluded based on LIVE/DEAD™ Fixable Violet Dead Cell Stain (FVD, Invitrogen, cat#  
110 L34955). For EC co-cultures, ECs were excluded by gating on CD45+ cells or CD45+CD144-  
111 cells.

112 A fraction of the C/G-CB cells isolated from xenograft models or cultured in EC co-  
113 culture or MC at various timepoints were sent to Hematologics, Inc (Seattle, WA) for  
114 assessment of the RAM immunophenotype along with C/G patient samples.

115

## 116 **Antibody Cocktails**

### 117 Antibody panel to assess transduced CB cells in xenograft mice:

- 118 • anti-mouse CD45.1 PE, cat#553776 (clone A20) BD Biosciences
- 119 • anti-human CD45 BUV805, cat#612891 (clone HI30) BD Biosciences
- 120 • anti-human CD3 BUV395, cat#564001 (clone SK7) BD Biosciences
- 121 • anti-human CD19 APC-eFluor780, cat#47-0198-42 (clone SJ25C1) eBioscience
- 122 • anti-human CD33 APC, cat#340474 (clone P67.6) BD Biosciences
- 123 • anti-human CD34 PE-Cy7, cat#348801 (clone 8G12) BD Biosciences
- 124 • anti-human CD41a BV650, cat#740575 (clone HIP8) BD Biosciences
- 125 • anti-human CD42b BUV661, cat#741614 (clone HIP1) BD Biosciences
- 126 • anti-human CD56 BUV737, cat#748609 (clone MY31) BD Biosciences
- 127 • anti-human CD117 PerCP-Cy5.5, cat#313214 (clone 104D2) Biolegend

128

### 129 Antibody panel to assess cultured CB cells:

- 130 • anti-human CD14 APC-Cy7, cat#557831 (clone MφP-9) BD Biosciences
- 131 • anti-human CD15 BUV805, cat#742057 (clone W6D3) BD Biosciences
- 132 • anti-human CD33 BUV395, cat#745709 (clone 104D2) BD Biosciences
- 133 • anti-human CD34 PE-Cy7, cat#348801 (clone P67.6) BD Biosciences
- 134 • anti-human CD41a BV650, cat#740575 (clone HIP8) BD Biosciences
- 135 • anti-human CD42b BUV661, cat#741614 (clone HIP1) BD Biosciences
- 136 • anti-human CD45 APC, cat#17-9459-42 (clone 2D1) eBioscience
- 137 • anti-human CD56 BUV737, cat#748609 (clone MY31) BD Biosciences
- 138 • anti-human FOLR1 PE, cat#908304 (clone LK26) Biolegend
- 139 • anti-human FOLR2 PE, cat#391703 (clone 94b) Biolegend

140

141 Antibody panel to assess unmodified/ CAR T and leukemia cells in xenograft mice:

- 142 • anti-mouse CD45.1 APC/Cy7, cat#110716 (clone A20) Biolegend
- 143 • anti-human CD45 BUV805, cat#612891 (clone HI30) BD Biosciences
- 144 • anti-human CD3 PE-Cy7, cat#563423 (clone UCHT1) BD Biosciences
- 145 • anti-human FOLR1 PE, cat#908304 (clone LK26) Biolegend

146

147 Antibody panel to assess FOLR1 expression in normal HSC, MPP and MLP subsets:

- 148 • anti-human CD34 BUV395 cat#563778 (clone 581) BD Biosciences
- 149 • anti-human CD38 PE-Cyanine7, cat#25-0389-42 (clone HIT2) eBioscience
- 150 • anti-human CD45 BUV805, cat#612891 (clone HI30) BD Biosciences
- 151 • anti-human CD45RA APC-eFluor780, cat#47-0458-42 (clone HI100) eBioscience
- 152 • anti-human CD90 PE-Cy5, cat#555597 (clone 5E10) BD Bioscience
- 153 • anti-human FOLR1 PE, cat#908304 (clone LK26) Biolegend

154

155 Antibody panel to assess FOLR1 expression in normal CLP, GMP, CMP and MEP subsets:

- 156 • anti-human CD10 B605, cat#562978 (clone HI10a) BD Biosciences
- 157 • anti-human CD34 BUV395 cat#563778 (clone 581) BD Biosciences
- 158 • anti-human CD38 PE-Cyanine7, cat# 25-0389-42 (clone HIT2) eBioscience
- 159 • anti-human CD45 BUV805, cat# 612891 (clone HI30) BD Biosciences
- 160 • anti-human CD45RA APC-eFluor780, cat# 47-0458-42 (clone HI100) eBioscience
- 161 • anti-human CD123 APC cat#658171 (clone 9F5) BD Biosciences
- 162 • anti-human FOLR1 PE, cat#908304 (clone LK26) Biolegend

163

#### 164 **Colony-forming cell assay**

165       Following 6 and 12 weeks of culture, cells were placed in or Megacult (Megacult-C,  
166 Collagen & Medium with Cytokines Stemcell Technologies, Cat #04961) and incubated at 37°C  
167 in 5% CO<sub>2</sub> for 10-14 days. Colonies from megacult cultures were fixed in 3.7% formaldehyde,  
168 and then washed in PBS, and stained with MegaCult™-C Staining Kit for CFU-Mk (StemCell  
169 Technologies Cat# 04962) per manufacturer's instructions; or were permeabilized after fixation  
170 in 0.1% Triton X-100 for 10min, blocked in in 1% BSA in PBST(PBS+0.1% Tween-20) for  
171 30min, then stained with biotin-conjugated mouse anti-human CD41 (Biolegend, cat# 303734)  
172 and FITC-conjugated goat anti-GFP(abcam, cat# ab6662) followed by secondary stain with  
173 Alexa 647-labeled Streptavidin (Biolegend, cat# 405237) per manufacturer's instructions, and  
174 colonies were stained with DAPI prior to imaging using the TissueFAX microscope. Mk colonies  
175 were scored based on positive staining for CD41 and enumerated.

176       C/G-CB and normal HPSCs after co-cultured with unmodified or CAR T cells for 4 hours  
177 were placed in Methocult H4034 Optimum (Stemcell Technologies, Cat #04034). Colonies  
178 derived from erythroid (E), granulocyte-macrophage (G, M, and GM) and multipotential

179 granulocyte, erythroid, macrophage, megakaryocyte (GEMM) progenitors were scored and  
180 enumerated after 7-10 days as directed by manufacturer's instructions.

181

## 182 **Histology and immunocytochemistry**

183 Sample tissues were fixed in 10% formalin, processed into paraffin sections and stained  
184 with hematoxylin and eosin (H&E). Immunohistochemistry was performed using antibodies to  
185 ERG (EP111; Cell Marque, Rockin, California) and CD56 (MRQ-42; Cell Marque) following  
186 citrate pretreatment and visualized with 3, 3'-diaminobenzidine (DAB) on a Ventana Bench Mark  
187 Ultra. All tissues were examined by a board certified Hematopathologist (KRL). The bone  
188 marrow core biopsy specimen was fixed in acetic acid-zinc-formalin (AZF), decalcified,  
189 and embedded in paraffin, and sections were stained for CD56 (MRQ-42; Cell Marque).

190 Tissue microarray (TMA) slides were purchased from US Biomax; sectioned at 5 $\mu$ m and  
191 stored at 4°C. Prior to staining, slides were baked at 60°C for 2 hours to ensure tissue adhesion.  
192 Staining was completed using a Ventana Discovery Ultra platform and corresponding reagents.  
193 After deparaffinization, antigen retrieval was performed using cell conditioner 1 (CC1, Cat# 950-  
194 224) at 95°C for 32mins. Blocking of endogenous background was done using Inhibitor CM  
195 (ChromoMap DAB Kit; cat# 760-159) for 12mins. The primary antibody (FolR1a, 26B3.F2;  
196 Morphotek), at a concentration of 1:300 in antibody diluent (Roche, Cat# 760-219), was  
197 incubated at 35°C for 28mins after which a secondary antibody/hapten linked solution (Anti-  
198 Mouse HQ, Cat# 760-4814) was introduced at 37°C for 12mins. Slides were then immersed in a  
199 hapten/HRP linked conjugate (Anti-HQ-HRP, Cat# 3 760-4820) for a further 12mins before  
200 developing using DAB (ChromoMap DAB). After chromogen attachment, the slides are  
201 counterstained with hematoxylin (Cat# 760-2021) and bluing solution (Cat# 760-2037) at 18°C  
202 for 8 mins each. Slides are then washed in soap water solution (Dawn), rinsed in DI water,  
203 dehydrated, cleared in xylene and mounted (Permount; Fisher Scientific, Cat# 5027798) for

204 microscopic evaluation. Slides were scanned on the Aperio AT Turbo (Leica, Deer Park, IL) and  
205 analyzed using the HALO analysis software (Indica Labs, v3.1, Albuquerque, NM)

206

207

## 208 **References for Supplemental Information**

209

210

211

- 212 1. Gruber TA, Larson Gedman A, Zhang J, Koss CS, Marada S, Ta HQ, et al. An  
213 Inv(16)(p13.3q24.3)-encoded CBFA2T3-GLIS2 fusion protein defines an aggressive  
214 subtype of pediatric acute megakaryoblastic leukemia. *Cancer Cell*. 2012;22(5):683-97.
- 215 2. Dull T, Zufferey R, Kelly M, Mandel RJ, Nguyen M, Trono D, et al. A third-generation  
216 lentivirus vector with a conditional packaging system. *J Virol*. 1998;72(11):8463-71.
- 217 3. Smith JL, Ries RE, Hylkema T, Alonzo TA, Gerbing RB, Santaguida MT, et al.  
218 Comprehensive Transcriptome Profiling of Cryptic CBFA2T3-GLIS2 Fusion-Positive  
219 AML Defines Novel Therapeutic Options: A COG and TARGET Pediatric AML Study.  
220 *Clin Cancer Res*. 2020;26(3):726-37.
- 221 4. Turtle CJ, Hanafi LA, Berger C, Hudecek M, Pender B, Robinson E, et al.  
222 Immunotherapy of non-Hodgkin's lymphoma with a defined ratio of CD8+ and CD4+  
223 CD19-specific chimeric antigen receptor-modified T cells. *Sci Transl Med*.  
224 2016;8(355):355ra116.
- 225 5. Haas BJ, Dobin A, Li B, Stransky N, Pochet N, and Regev A. Accuracy assessment of  
226 fusion transcript detection via read-mapping and de novo fusion transcript assembly-  
227 based methods. *Genome Biol*. 2019;20(1):213.
- 228 6. Robertson G, Schein J, Chiu R, Corbett R, Field M, Jackman SD, et al. De novo  
229 assembly and analysis of RNA-seq data. *Nat Methods*. 2010;7(11):909-12.
- 230 7. Ritchie ME, Phipson B, Wu D, Hu Y, Law CW, Shi W, et al. limma powers differential  
231 expression analyses for RNA-sequencing and microarray studies. *Nucleic Acids Res*.  
232 2015;43(7):e47.
- 233 8. Hanzelmann S, Castelo R, and Guinney J. GSEA: gene set variation analysis for  
234 microarray and RNA-seq data. *BMC Bioinformatics*. 2013;14:7.
- 235 9. Leland McInnes JH, James Melville. UMAP: Uniform Manifold Approximation and  
236 Projection for Dimension Reduction. *arxiv*. 2020:

237 .

238

239

## 240 **Supplemental Figure Legends**

241

242 **Supplemental Figure 1. C/G-CB cells form tight clusters in mouse bone marrow. (Related**  
243 **to Figure 1)** H&E stains of femurs taken from primary, secondary and tertiary transplants of  
244 C/G-CB cells. Magnification: 2.5X(left), 10X (middle), 40X (right).

245  
246 **Supplemental Figure 2. Expression of CD56 and AMKL markers in C/G-CB xenograft cells**  
247 **following development of symptomatic leukemia in NSG-SGM3 mice. (Related to Figure**

248 **1) A.** Percent human CD45<sup>+</sup> cells in the bone marrow, spleen, liver and peripheral blood (PB)  
249 from mice transplanted with C/G-CB cells in primary (1°, N=4 mice), secondary (2°, N=7 mice)  
250 and tertiary (3°, N=5 mice) transplants. **B, C.** Percent CD56<sup>+</sup> and CD41/CD42 subsets in  
251 mouse tissues described in A. 1°, N=4 mice per group; 2°, N=7 mice; and 3°, N=5 mice.

252  
253 **Supplemental Figure 3. Assessment of RAM and AMKL markers in C/G-CB cells isolated**  
254 **from mice transplanted with engineered cells cultured in EC co-culture or MC. (Related to**

255 **Figure 2) A.** Percent human CD45<sup>+</sup> cells in the bone marrow, spleen liver and peripheral blood  
256 from mice transplanted with C/G-CB and GFP-CB cells at indicated timepoints in EC co-culture  
257 or MC. **B, C.** Percent CD41/CD42 subsets (B) and CD56<sup>+</sup> cells (C) among live human CD45<sup>+</sup> in  
258 mouse tissues described in A. Data analyzing CB cells in the liver for mice transplanted with  
259 GFP-CB cells from MC culture are not included as not enough cells were present in these  
260 samples. Same goes for peripheral blood data from 2 mice transplanted with C/G-CB cells  
261 grown in MC. C/G-CB (N=3 mice/group), GFP-CB (N=2 mice/group)

262  
263 **Supplemental Figure 4. ECs promote transformation of C/G-CB cells. (Related to Figure**

264 **2) A.** Schematic of transduction and long-term cultures of cord blood CD34<sup>+</sup> HSPCs from a  
265 second donor. **B.** Growth kinetics of transduced cells over days in EC or MC as determined by  
266 the cumulative number of GFP<sup>+</sup> cells. Mean +/- standard deviation from 3 technical replicates

267 are shown. Growth rate constant  $k$  was determined by regression analysis using the formula  
268  $N(t) = N(0)e^{kt}$  where  $t$  is measured in days. **C.** Following 6 and 12 weeks of culture, a fraction of  
269 each culture was transferred to megacult to enumerate Mk colonies. Data are normalized to the  
270 CD34+ input cells at the start of the culture and presented as mean +/- standard deviation from  
271 3 technical replicates. **D.** Expression of the RAM immunophenotype in C/G-CB cells after 6  
272 weeks in either EC co-culture or MC.

273

274 **Supplemental Figure 5. Expression of C/G-specific genes. (Related to Figure 3)** Heat maps  
275 showing expression of C/G-specific focal adhesion and cell adhesion molecule genes (**A**),  
276 genes associated with primary C/G fusion positive AML (**B**), and HSC signature genes (**C**).  
277 Unsupervised hierarchical clustering demonstrates clustering of C/G-CB cells cultured with ECs  
278 for 6 and 12 weeks with primary C/G samples. CBFA2T3-GLIS2 primary samples (N=39); NBM  
279 samples (N=68). For cultured cells, N=4 technical replicates for C/G-CB cells in EC co-culture at  
280 week; N=3 technical replicates for all other groups.

281

282 **Supplemental Figure 6. Identification of C/G fusion-specific CAR targets. (Related to**  
283 **Figure 4A)** Flow diagram of AML-restricted gene and CAR-T target identification. The  
284 procedure involves three main steps: 1) Determine the ratio of expression for AML primary  
285 samples versus healthy normal hematopoietic tissue samples (bulk marrows and CD34+  
286 peripheral blood) from log10 transformed normalized gene expression. The ratio is calculated  
287 per gene from mean AML expression and mean normal hematopoietic tissue expression, where  
288 normal tissue values are the divisor, which acts as a measure of over or under expression. A  
289 normal curve is fit to the ratios and this procedure is completed for all heterogenous AML  
290 samples as a group, and iteratively within fusion and mutation subtypes; genes with ratios  
291 greater than +2 standard deviations and with absent expression in normal hematopoietic tissues  
292 were retained (N=607) for further analysis. 2) The AML restricted genes were further selected if

293 found to be significantly overexpressed in fusion positive patient samples compared to healthy  
294 marrows and were likewise overexpressed in C/G-CB at weeks 6 and 12 in EC co-culture with  
295 absent expression in GFP-CB controls, providing several candidate (N=42) targets. 3) Optimal  
296 CAR-T targets were selected by the identification of candidate genes with cell surface  
297 localization potential, and those with an absence of expression in healthy tissue controls as  
298 noted in step 1, but expression in > 75% of C/G patient samples, and with moderate to high  
299 expression levels (N=6).

300

301 **Supplemental Figure 7. *FOLR1* transcript is uniquely expressed in C/G AML.** Waterplot  
302 showing transcript expression (TPM) among C/G AML (red, N=39), other AML (pink, N=1,453),  
303 peripheral blood (PB) CD34+ samples (grey, N=16) and bulk bone marrow samples (black,  
304 N=68).

305

306 **Supplemental Figure 8. Expression of *FOLR1* transcript in C/G-CB cells cultured on ECs.**  
307 RT-PCR analysis of *FOLR1* expression in engineered CB cells and in fusion positive cell lines  
308 M07e and WSU-AML. Expression is normalized as fold-change relative to GFP-CB/EC Wk 3  
309 samples. Data shown is the average of 3 technical replicates. Error bars denote standard  
310 deviation.

311

312 **Supplemental Figure 9. Expression of *FOLR2* (folate receptor beta) in C/G AML. A.** Heat  
313 map showing expression of *FOLR1* and *FOLR2* among C/G-positive patients at diagnostic and  
314 relapse, and in bone marrow samples from healthy donors. **B, C.** Transcript (B) and cell surface  
315 (C) expression of *FOLR1* and *FOLR2* in C/G-CB and GFP-CB cells over weeks in EC co-  
316 culture.

317

318 **Supplemental Figure 10. Expression of *FOLR1* in normal tissues.** Immunohistochemistry of



319 FOLR1 staining in 32 types of normal human organs (Tissue Microarray, TMA FDA999u), each  
320 type taken from 3 different individuals. Top, sample ID; bottom, FOLR1-stained TMA.

321

322 **Supplemental Figure 11. In vitro reactivity of FOLR1 CAR T cells against C/G AML cells.**

323 **A.** Flow cytometric analysis of FOLR1 and MSLN expression in C/G-CB cells and WSU-AML  
324 cell line. **B.** Cytolytic activity of CD8 T cells unmodified or transduced with FOLR1 CAR or  
325 MSLN CAR following 6 hours of co-culture with C/G-CB (cell taken from >9 weeks in EC co-  
326 culture) or WSU-AML. Data presented are mean leukemia specific lysis +/- SD from 3 technical  
327 replicates at indicated effector: target (E:T) ratios. T cells were derived from two additional  
328 donors. **C.** Concentration of secreted IL-2, IFN- $\gamma$ , and TNF- $\alpha$  in the supernatant following 24  
329 hour of T cell/AML co-culture at 1:1 E:T ratio as measured by ELISA. Data are derived from T  
330 cells isolated from donor 2 and are presented as mean +/- SD from 3 technical replicates.

331 Where concentrations of cytokines are too low to discern, the number above the x-axis indicates  
332 the average concentration. **D.** Left, flow cytometric analysis of FOLR1 and MSLN expression in  
333 Nomo-1 AML cell line. Middle, cytolytic activity of CD8 T cells unmodified or transduced with  
334 FOLR1 CAR or MSLN CAR following 24 hours of co-culture with Nomo-1 cells. Data presented  
335 are mean leukemia specific lysis +/- SD from 3 technical replicates at indicated E:T ratios. Right,  
336 concentration of secreted IL-2, IFN- $\gamma$ , and TNF- $\alpha$  in the supernatant following 24 hour of T  
337 cell/AML co-culture at 1:1 E:T ratio as measured by ELISA. Data are derived from T cells  
338 isolated from donor 2. **E.** Flow cytometric analysis of FOLR1 in WSU-AML FOLR1 knock out  
339 (KO). **F.** Cytolytic activity of CD8 T cells unmodified or transduced with FOLR1 CAR or MSLN  
340 CAR following 24 hours of co-culture with WSU-AML cells or WSU-AML FOLR1 KO cells. Data  
341 are derived from T cells isolated from donor 2 and are presented as mean +/- SD from 3  
342 technical replicates. **G.** Concentration of secreted IL-2, IFN- $\gamma$ , and TNF- $\alpha$  in the supernatant  
343 following 24 hour of T cell/AML co-culture at 1:1 E:T ratio as measured by ELISA. Data are  
344 derived from T cells isolated from donor 2 and are presented as mean +/- SD from 3 technical

345 replicates. Where concentrations of cytokines are too low to discern, the number above the x-  
346 axis indicates the average concentration.

347

348 **Supplemental Figure 12. In vivo efficacy of FOLR1-directed CAR T. (Related to Figure 6)**

349 **A.** Bioluminescent imaging of C/G-CB, WSU-AML, Kasumi-1 *FOLR1*+ and Kasumi-1 leukemias  
350 in mice treated with unmodified or FOLR1 CAR T cells at  $5 \times 10^6$  T cells per mouse. Shown are  
351 the images one day before T cell treatment and 4 weeks after T cell treatment. N=5 mice/  
352 group. Radiance scale indicates an increase in leukemia from blue to red; X indicates death. **B.**  
353 Quantification of leukemia burden over time based on IVIS radiance in CBFA2T3-GLIS2-  
354 transduced HSPCs, WSU-AML, Kasumi-1 *FOLR1*+ and Kasumi-1 xenografts treated with  
355 unmodified or FOLR1 CAR T cells at  $5 \times 10^6$ /mouse. Leukemia burden is shown for each mouse.  
356 N = 5 mice per group. Data presented are the average +/- standard deviation from 5 mice. \*,  
357  $p < 0.05$  (unpaired Student's t-test). **C.** Quantification of human T cells in the mouse peripheral  
358 blood at indicated time points after T cell injection. Shown is human CD45+CD3+ frequency  
359 amongst DAPI- cells. N = 5 mice per group. Data presented are the average +/- standard  
360 deviation from 5 mice. \*,  $p < 0.05$  (unpaired Student's t-test). **D, E.** Quantification of percent  
361 leukemia cells (human CD45+, D) and percent FOLR1 positive amongst leukemia cells (E) in  
362 the liver and spleen tissues at necropsy (either when mice developed symptomatic leukemia or  
363 euthanized at the indicated study endpoint. Note that some mice are missing because they were  
364 found dead in cage (FDIC), or tissues were not viable. For cases where leukemia burden is  
365 absent, FOLR1 expression could not be determined for these mice and were excluded from the  
366 analysis. Data presented are the average +/- standard deviation \*,  $p < 0.05$  (unpaired Student's t-  
367 test).

368

369 **Supplemental Figure 13. FORL1 cell surface expression across patient samples, C/G-CB**

370 **cells, cell lines and engineered cells.** Flow analysis of antigen density (number of FOLR1

371 molecules per cell) across C/G-positive patient specimens, C/G-CB cells after 9 weeks in EC  
372 co-culture, WSU-AML, Kasumi-1 FOLR1+ and Kasumi-1 parental cells. Arrow points to C/G-  
373 positive patient (Patient B) used in the evaluation of FOLR1 CAR T cells (Figure 7).

374

375 **Supplemental Figure 14. In vitro cytotoxicity of FOLR1 CAR T cells against primary C/G**  
376 **AML cells (Related to Figure 7) Cytolytic activity of CD8 T cells unmodified or transduced**  
377 **with FOLR1 CAR or MSLN CAR following 6 hours of co-culture with primary C/G AML**  
378 **cells. CAR T cells were produced from two additional donors (separate from the donor**  
379 **shown in Figure 7).**

380

381 **Supplemental Figure 15. Expression of FOLR1 in primary AML cells that were present in**  
382 **CAR T-treated mouse that developed symptomatic leukemia at 180 days post T cell**  
383 **injection. (Related to Figure 7) Left, percent of human CD45+ cells in the bone marrow,**  
384 **spleen and blood of the CAR T-treated mouse that relapsed at day 180 post T cell injection.**  
385 **Right, percent of human CD45+ cells that expression FOLR1.**

386

387 **Supplemental Figure 16. Expression of C/G transcript in C/G-CB cells. RT-PCR analysis of**  
388 **C/G expression in engineered CB cells and in fusion positive cell lines M07e and WSU-AML.**  
389 **Data shown is the average of 3 technical replicates. Error bars denote standard deviation.**

390

391 **Supplemental Figure 17. Transduction efficiency of FOLR1 CAR construct. Representative**  
392 **transduction efficiency of CD4 and CD8 T cells with FOLR1 CAR (intermediate spacer)**  
393 **lentivirus after 7 days post transduction.**
